# Supplementary material for: The Masticatory Activity Interference in Quantitative Estimation of CA1, CA3 and Dentate Gyrus Hippocampal Astrocytes of Aged Murine Models and under Environmental Stimulation
Source: MDPI journal article supplement (doi:10.3390/ijms24076529), 2023-03-31
Supplement: s1 [file s1]

Table S1. Estimated Unilateral Numbers of Astrocytes (N) With the Coefficient of Error (CE) for the Stratum Lacunosum-Moleculare of CA1 of 6-, and 18-Month-Old Female Albino Swiss Mice Fed a Hard Diet (HD), Hard/Soft Diet (HD/SD) and Hard/Soft/Hard Diet (HDSHD).

| <b>STRATUM LACUNOSUM-MOLECULARE – CA1</b>    |          |                       |                       |
|----------------------------------------------|----------|-----------------------|-----------------------|
| <b>HD / 6M / Impoverished Environment</b>    |          |                       |                       |
| <b>Subjects</b>                              | <b>N</b> | <b>Thickness (μm)</b> | <b>CE (Scheaffer)</b> |
| HD 6M IE Animal 1                            | 10847.06 | 24.77 ± 0.76          | 0.05                  |
| HD 6M IE Animal 2                            | 12047.31 | 23.4 ± 0.68           | 0.06                  |
| HD 6M IE Animal 3                            | 24290.66 | 21.74 ± 0.65          | 0.04                  |
| HD 6M IE Animal 4                            | 11168.4  | 25.27 ± 0.42          | 0.05                  |
| HD 6M IE Animal 5                            | 15503.83 | 23.33 ± 0.68          | 0.05                  |
| Mean                                         | 14771.45 | 23.71 ± 0.64          | 0.05                  |
| Standard Error                               | 2519.48  | 0.62 ± 0.06           |                       |
| CV <sup>2</sup>                              | 0.145    |                       |                       |
| CE <sup>2</sup>                              | 0.002    |                       |                       |
| CE <sup>2</sup> / CV <sup>2</sup>            | 0.017    |                       |                       |
| CVB <sup>2</sup>                             | 0.143    |                       |                       |
| CVB <sup>2</sup> (% of CV <sup>2</sup> )     | 98.35%   |                       |                       |
| <b>HDSHD / 6M / Impoverished Environment</b> |          |                       |                       |
| <b>Subjects</b>                              | <b>N</b> | <b>Thickness (μm)</b> | <b>CE (Scheaffer)</b> |
| HDSHD 6M IE Animal 1                         | 8634.51  | 26.00 ± 0.48          | 0.05                  |
| HDSHD 6M IE Animal 2                         | 11173.63 | 23.61 ± 1.14          | 0.05                  |
| HDSHD 6M IE Animal 3                         | 7505.31  | 21.53 ± 0.77          | 0.05                  |
| HDSHD 6M IE Animal 4                         | 10758.6  | 22.39 ± 0.79          | 0.05                  |
| HDSHD 6M IE Animal 5                         | 13272.69 | 24.01 ± 0.37          | 0.05                  |
| Mean                                         | 10268.95 | 23.51 ± 0.71          | 0.05                  |
| Standard Error                               | 1009.70  | 0.76 ± 0.13           |                       |
| CV <sup>2</sup>                              | 0.048    |                       |                       |
| CE <sup>2</sup>                              | 0.002    |                       |                       |
| CE <sup>2</sup> / CV <sup>2</sup>            | 0.054    |                       |                       |
| CVB <sup>2</sup>                             | 0.046    |                       |                       |
| CVB <sup>2</sup> (% of CV <sup>2</sup> )     | 94.51%   |                       |                       |

| HDSDHD / 6M / Impoverished Environment   |          |                |                |
|------------------------------------------|----------|----------------|----------------|
| Subjects                                 | N        | Thickness (μm) | CE (Scheaffer) |
| HDSDHD 6M IE Animal 1                    | 17495.57 | 23.88 ± 0.82   | 0.05           |
| HDSDHD 6M IE Animal 2                    | 9147.94  | 21.67 ± 0.23   | 0.06           |
| HDSDHD 6M IE Animal 3                    | 14870.31 | 21.21 ± 0.49   | 0.05           |
| HDSDHD 6M IE Animal 4                    | 13456.29 | 22.67 ± 0.65   | 0.05           |
| HDSDHD 6M IE Animal 5                    | 9521.06  | 20.40 ± 0.79   | 0.05           |
| Mean                                     | 12898.23 | 21.97 ± 0.60   | 0.05           |
| Standard Error                           | 1593.83  | 0.60 ± 0.11    |                |
| CV <sup>2</sup>                          | 0.076    |                |                |
| CE <sup>2</sup>                          | 0.002    |                |                |
| CE <sup>2</sup> / CV <sup>2</sup>        | 0.033    |                |                |
| CVB <sup>2</sup>                         | 0.074    |                |                |
| CVB <sup>2</sup> (% of CV <sup>2</sup> ) | 96.74%   |                |                |
| HD / 18M / Impoverished Environment      |          |                |                |
| Subjects                                 | N        | Thickness (μm) | CE (Scheaffer) |
| HD 18M IE Animal 1                       | 7696.28  | 25.41 ± 0.39   | 0.06           |
| HD 18M IE Animal 2                       | 9894.43  | 26.34 ± 0.35   | 0.06           |
| HD 18M IE Animal 3                       | 11195.23 | 25.80 ± 0.27   | 0.06           |
| HD 18M IE Animal 4                       | 6424.63  | 23.2 ± 0.56    | 0.06           |
| HD 18M IE Animal 5                       | 6650.14  | 23.2 ± 0.2     | 0.07           |
| Mean                                     | 8372.14  | 24.79 ± 0.35   | 0.06           |
| Standard Error                           | 935.47   | 0.67 ± 0.06    |                |
| CV <sup>2</sup>                          | 0.062    |                |                |
| CE <sup>2</sup>                          | 0.003    |                |                |
| CE <sup>2</sup> / CV <sup>2</sup>        | 0.056    |                |                |
| CVB <sup>2</sup>                         | 0.059    |                |                |
| CVB <sup>2</sup> (% of CV <sup>2</sup> ) | 94.38%   |                |                |
| HDSD / 18M / Impoverished Environment    |          |                |                |
| Subjects                                 | N        | Thickness (μm) | CE (Scheaffer) |
| HDSD 18M IE Animal 1                     | 10726.71 | 24.25 ± 0.46   | 0.05           |
| HDSD 18M IE Animal 2                     | 8131.89  | 23.91 ± 0.68   | 0.06           |
| HDSD 18M IE Animal 3                     | 8522.65  | 22.58 ± 0.51   | 0.06           |
| HDSD 18M IE Animal 4                     | 5979.69  | 26.19 ± 0.91   | 0.06           |

|                                                |          |                       |                       |
|------------------------------------------------|----------|-----------------------|-----------------------|
| HDSD 18M IE Animal 5                           | 16286.57 | 26.04 ± 0.27          | 0.05                  |
| Mean                                           | 9929.50  | 24.60 ± 0.56          | 0.06                  |
| Standard Error                                 | 1758.69  | 0.68 ± 0.11           |                       |
| CV <sup>2</sup>                                | 0.157    |                       |                       |
| CE <sup>2</sup>                                | 0.003    |                       |                       |
| CE <sup>2</sup> / CV <sup>2</sup>              | 0.021    |                       |                       |
| CVB <sup>2</sup>                               | 0.154    |                       |                       |
| CVB <sup>2</sup> (% of CV <sup>2</sup> )       | 97.93%   |                       |                       |
| <b>HDSDHD / 18M / Impoverished Environment</b> |          |                       |                       |
| <b>Subjects</b>                                | <b>N</b> | <b>Thickness (μm)</b> | <b>CE (Scheaffer)</b> |
| HDSDHD 18M IE Animal 1                         | 18148.54 | 26.56 ± 1.10          | 0.04                  |
| HDSDHD 18M IE Animal 2                         | 13046.57 | 24.53 ± 0.92          | 0.05                  |
| HDSDHD 18M IE Animal 3                         | 8379.60  | 21.99 ± 0.59          | 0.05                  |
| HDSDHD 18M IE Animal 4                         | 16134.17 | 24.01 ± 0.61          | 0.05                  |
| HDSDHD 18M IE Animal 5                         | 12367.11 | 23.60 ± 1.18          | 0.05                  |
| Mean                                           | 13615.20 | 24.14 ± 0.88          | 0.05                  |
| Standard Error                                 | 1676.14  | 0.74 ± 0.12           |                       |
| CV <sup>2</sup>                                | 0.076    |                       |                       |
| CE <sup>2</sup>                                | 0.003    |                       |                       |
| CE <sup>2</sup> / CV <sup>2</sup>              | 0.034    |                       |                       |
| CVB <sup>2</sup>                               | 0.073    |                       |                       |
| CVB <sup>2</sup> (% of CV <sup>2</sup> )       | 96.60%   |                       |                       |
| <b>HD / 6M / Enriched Environment</b>          |          |                       |                       |
| <b>Subjects</b>                                | <b>N</b> | <b>Thickness (μm)</b> | <b>CE (Scheaffer)</b> |
| HD 6M EE Animal 1                              | 16077.43 | 25.54 ± 0.42          | 0.04                  |
| HD 6M EE Animal 2                              | 10361.74 | 21.72 ± 0.42          | 0.06                  |
| HD 6M EE Animal 3                              | 13856.49 | 26.45 ± 0.45          | 0.04                  |
| HD 6M EE Animal 4                              | 15499.29 | 25.71 ± 1.09          | 0.04                  |
| HD 6M EE Animal 5                              | 17044.8  | 23.92 ± 0.67          | 0.04                  |
| Mean                                           | 14567.95 | 24.67 ± 0.61          | 0.05                  |
| Standard Error                                 | 1172.16  | 0.84 ± 0.13           |                       |
| CV <sup>2</sup>                                | 0.032    |                       |                       |
| CE <sup>2</sup>                                | 0.002    |                       |                       |
| CE <sup>2</sup> / CV <sup>2</sup>              | 0.065    |                       |                       |

|                                           |          |                       |                       |
|-------------------------------------------|----------|-----------------------|-----------------------|
| CVB <sup>2</sup>                          | 0.065    |                       |                       |
| CVB <sup>2</sup> (% of CV <sup>2</sup> )  | 93.55%   |                       |                       |
| <b>HDSD / 6M / Enriched Environment</b>   |          |                       |                       |
| <b>Subjects</b>                           | <b>N</b> | <b>Thickness (μm)</b> | <b>CE (Scheaffer)</b> |
| HDSD 6M EE Animal 1                       | 14118    | 25.62 ± 0.95          | 0.05                  |
| HDSD 6M EE Animal 2                       | 11958.42 | 22.10 ± 0.72          | 0.05                  |
| HDSD 6M EE Animal 3                       | 16099.03 | 24.03 ± 0.89          | 0.05                  |
| HDSD 6M EE Animal 4                       | 21209.57 | 23.95 ± 0.71          | 0.04                  |
| HDSD 6M EE Animal 5                       | 18310.63 | 27.75 ± 0.30          | 0.05                  |
| Mean                                      | 16339.13 | 24.69 ± 0.71          | 0.05                  |
| Standard Error                            | 1609.19  | 0.95 ± 0.11           |                       |
| CV <sup>2</sup>                           | 0.048    |                       |                       |
| CE <sup>2</sup>                           | 0.002    |                       |                       |
| CE <sup>2</sup> / CV <sup>2</sup>         | 0.043    |                       |                       |
| CVB <sup>2</sup>                          | 0.046    |                       |                       |
| CVB <sup>2</sup> (% of CV <sup>2</sup> )  | 95.67%   |                       |                       |
| <b>HDSDHD / 6M / Enriched Environment</b> |          |                       |                       |
| <b>Subjects</b>                           | <b>N</b> | <b>Thickness (μm)</b> | <b>CE (Scheaffer)</b> |
| HDSDHD 6M EE Animal 1                     | 15701.83 | 21.08 ± 0.73          | 0.05                  |
| HDSDHD 6M EE Animal 2                     | 14057.57 | 22.16 ± 0.5           | 0.04                  |
| HDSDHD 6M EE Animal 3                     | 12307.11 | 24.38 ± 0.69          | 0.05                  |
| HDSDHD 6M EE Animal 4                     | 13913.14 | 24.71 ± 0.5           | 0.05                  |
| HDSDHD 6M EE Animal 5                     | 15292.46 | 26.56 ± 0.43          | 0.05                  |
| Mean                                      | 14254.42 | 23.78 ± 0.58          |                       |
| Standard Error                            | 596.65   | 0.97 ± 0.06           |                       |
| CV <sup>2</sup>                           | 0.009    |                       |                       |
| CE <sup>2</sup>                           | 0.002    |                       |                       |
| CE <sup>2</sup> / CV <sup>2</sup>         | 0.262    |                       |                       |
| CVB <sup>2</sup>                          | 0.006    |                       |                       |
| CVB <sup>2</sup> (% of CV <sup>2</sup> )  | 73.808%  |                       |                       |
| <b>HD / 18M / Enriched Environment</b>    |          |                       |                       |
| <b>Subjects</b>                           | <b>N</b> | <b>Thickness (μm)</b> | <b>CE (Scheaffer)</b> |
| HD 18M EE Animal 1                        | 19155.86 | 25.78 ± 0.73          | 0.05                  |
| HD 18M EE Animal 2                        | 14752.97 | 26.29 ± 0.36          | 0.05                  |

|                                            |          |                       |                       |
|--------------------------------------------|----------|-----------------------|-----------------------|
| HD 18M EE Animal 3                         | 14111.49 | 27.78 ± 0.58          | 0.05                  |
| HD 18M EE Animal 4                         | 16170.17 | 25.26 ± 0.52          | 0.04                  |
| HD 18M EE Animal 5                         | 10140.51 | 26.56 ± 1.73          | 0.06                  |
| Mean                                       | 14866.20 | 26.33 ± 0.79          |                       |
| Standard Error                             | 1466.56  | 0.42 ± 0.24           |                       |
| CV <sup>2</sup>                            | 0.049    |                       |                       |
| CE <sup>2</sup>                            | 0.002    |                       |                       |
| CE <sup>2</sup> / CV <sup>2</sup>          | 0.049    |                       |                       |
| CVB <sup>2</sup>                           | 0.046    |                       |                       |
| CVB <sup>2</sup> (% of CV <sup>2</sup> )   | 95.126%  |                       |                       |
| <b>HDSD / 18M / Enriched Environment</b>   |          |                       |                       |
| <b>Subjects</b>                            | <b>N</b> | <b>Thickness (μm)</b> | <b>CE (Scheaffer)</b> |
| HDSD 18M EE Animal 1                       | 18938.43 | 24.53 ± 0.72          | 0.04                  |
| HDSD 18M EE Animal 2                       | 17252.57 | 25.82 ± 0.62          | 0.04                  |
| HDSD 18M EE Animal 3                       | 11189.49 | 25.29 ± 0.69          | 0.05                  |
| HDSD 18M EE Animal 4                       | 16946.74 | 25.40 ± 0.32          | 0.05                  |
| HDSD 18M EE Animal 5                       | 18383.83 | 26.13 ± 0.70          | 0.04                  |
| Mean                                       | 16542.21 | 25.43 ± 0.61          |                       |
| Standard Error                             | 1386.60  | 0.27 ± 0.07           |                       |
| CV <sup>2</sup>                            | 0.035    |                       |                       |
| CE <sup>2</sup>                            | 0.002    |                       |                       |
| CE <sup>2</sup> / CV <sup>2</sup>          | 0.056    |                       |                       |
| CVB <sup>2</sup>                           | 0.033    |                       |                       |
| CVB <sup>2</sup> (% of CV <sup>2</sup> )   | 94.363%  |                       |                       |
| <b>HDSDHD / 18M / Enriched Environment</b> |          |                       |                       |
| <b>Subjects</b>                            | <b>N</b> | <b>Thickness (μm)</b> | <b>CE (Scheaffer)</b> |
| HDSDHD 18M EE Animal 1                     | 19202.06 | 26.41 ± 0.89          | 0.04                  |
| HDSDHD 18M EE Animal 2                     | 14545.8  | 26.62 ± 0.93          | 0.05                  |
| HDSDHD 18M EE Animal 3                     | 19602.77 | 24.4 ± 0.51           | 0.04                  |
| HDSDHD 18M EE Animal 4                     | 12609.86 | 23.93 ± 0.74          | 0.04                  |
| HDSDHD 18M EE Animal 5                     | 19395.51 | 25.37 ± 0.43          | 0.04                  |
| Mean                                       | 17071.20 | 25.35 ± 0.7           |                       |
| Standard Error                             | 1460.02  | 0.53 ± 0.1            |                       |
| CV <sup>2</sup>                            | 0.037    |                       |                       |

|                        |        |  |  |
|------------------------|--------|--|--|
| $CE^2$                 | 0.002  |  |  |
| $CE^2 / CV^2$          | 0.050  |  |  |
| $CVB^2$                | 0.035  |  |  |
| $CVB^2$ (% of $CV^2$ ) | 95.04% |  |  |

$CVB^2 = CV^2 - CE^2$  (CV, coefficient of variation; CVB, biological coefficient of variation; CE, coefficient of error). N = number of astrocytes; Mean = mean numbers in each group; 6M and 18M indicate 6 months old and 18 months old, respectively.

Table S2. Estimated Unilateral Numbers of Astrocytes (N) With the Coefficient of Error (CE) for the Stratum Radiatum of CA1 of 6-, and 18-Month-Old Female Albino Swiss Mice Fed a Hard Diet (HD), Hard/Soft Diet (HD/SD) and Hard/Soft/Hard Diet (HDSHD).

| <b>STRATUM RADIATUM – CA1</b>             |          |                       |                       |
|-------------------------------------------|----------|-----------------------|-----------------------|
| <b>HD / 6M / Impoverished Environment</b> |          |                       |                       |
| <b>Subjects</b>                           | <b>N</b> | <b>Thickness (μm)</b> | <b>CE (Scheaffer)</b> |
| HD 6M IE Animal 1                         | 13379.6  | 23.52 ± 1.39          | 0.04                  |
| HD 6M IE Animal 2                         | 14269.4  | 24.66 ± 0.51          | 0.04                  |
| HD 6M IE Animal 3                         | 21801.6  | 22.04 ± 0.99          | 0.04                  |
| HD 6M IE Animal 4                         | 17233.97 | 24.89 ± 0.45          | 0.04                  |
| HD 6M IE Animal 5                         | 15100.6  | 22.99 ± 0.57          | 0.04                  |
| Mean                                      | 16357.03 | 23.62 ± 0.78          | 0.04                  |
| Standard Error                            | 1503.57  | 0.53 ± 0.18           |                       |
| $CV^2$                                    | 0.042    |                       |                       |
| $CE^2$                                    | 0.001    |                       |                       |
| $CE^2 / CV^2$                             | 0.033    |                       |                       |
| $CVB^2$                                   | 0.040    |                       |                       |
| $CVB^2$ (% of $CV^2$ )                    | 96.65%   |                       |                       |

| HDSD / 6M / Impoverished Environment     |          |                |                |
|------------------------------------------|----------|----------------|----------------|
| Subjects                                 | N        | Thickness (μm) | CE (Scheaffer) |
| HDSD 6M IE Animal 1                      | 8411.31  | 22.31 ± 0.99   | 0.05           |
| HDSD 6M IE Animal 2                      | 12215.57 | 23.43 ± 0.94   | 0.04           |
| HDSD 6M IE Animal 3                      | 9707.06  | 21.635 ± 0.70  | 0.04           |
| HDSD 6M IE Animal 4                      | 11952    | 21.03 ± 0.60   | 0.03           |
| HDSD 6M IE Animal 5                      | 13537.8  | 24.17 ± 0.33   | 0.04           |
| Mean                                     | 11164.75 | 22.52 ± 0.71   | 0.04           |
| Standard Error                           | 923.62   | 0.57 ± 0.12    |                |
| CV <sup>2</sup>                          | 0.034    |                |                |
| CE <sup>2</sup>                          | 0.002    |                |                |
| CE <sup>2</sup> / CV <sup>2</sup>        | 0.050    |                |                |
| CVB <sup>2</sup>                         | 0.032    |                |                |
| CVB <sup>2</sup> (% of CV <sup>2</sup> ) | 94.92%   |                |                |
| HDSDHD / 6M / Impoverished Environment   |          |                |                |
| Subjects                                 | N        | Thickness (μm) | CE (Scheaffer) |
| HDSDHD 6M IE Animal 1                    | 15494.57 | 23.27 ± 1.08   | 0.04           |
| HDSDHD 6M IE Animal 2                    | 10713.94 | 21.49 ± 0.4    | 0.04           |
| HDSDHD 6M IE Animal 3                    | 14380.03 | 20.77 ± 0.62   | 0.03           |
| HDSDHD 6M IE Animal 4                    | 14769.43 | 22.70 ± 0.45   | 0.04           |
| HDSDHD 6M IE Animal 5                    | 11700.77 | 19.66 ± 0.75   | 0.04           |
| Mean                                     | 13411.75 | 21.58 ± 0.66   | 0.04           |
| Standard Error                           | 930.72   | 0.65 ± 0.12    |                |
| CV <sup>2</sup>                          | 0.024    |                |                |
| CE <sup>2</sup>                          | 0.001    |                |                |
| CE <sup>2</sup> / CV <sup>2</sup>        | 0.058    |                |                |
| CVB <sup>2</sup>                         | 0.023    |                |                |
| CVB <sup>2</sup> (% of CV <sup>2</sup> ) | 94.22%   |                |                |
| HD / 18M / Impoverished Environment      |          |                |                |
| Subjects                                 | N        | Thickness (μm) | CE (Scheaffer) |
| HD 18M IE Animal 1                       | 10310.57 | 24.52 ± 0.42   | 0.04           |
| HD 18M IE Animal 2                       | 8713.37  | 23.84 ± 0.32   | 0.05           |
| HD 18M IE Animal 3                       | 8809.37  | 26.14 ± 0.46   | 0.05           |
| HD 18M IE Animal 4                       | 8966.06  | 23.51 ± 0.60   | 0.05           |

|                                                |          |                       |                       |
|------------------------------------------------|----------|-----------------------|-----------------------|
| HD 18M IE Animal 5                             | 8701.46  | 23 ± 0.45             | 0.05                  |
| Mean                                           | 9100.17  | 24.20 ± 0.45          | 0.05                  |
| Standard Error                                 | 306.28   | 0.54 ± 0.04           |                       |
| CV <sup>2</sup>                                | 0.006    |                       |                       |
| CE <sup>2</sup>                                | 0.002    |                       |                       |
| CE <sup>2</sup> / CV <sup>2</sup>              | 0.390    |                       |                       |
| CVB <sup>2</sup>                               | 0.003    |                       |                       |
| CVB <sup>2</sup> (% of CV <sup>2</sup> )       | 61%      |                       |                       |
| <b>HDSD / 18M / Impoverished Environment</b>   |          |                       |                       |
| <b>Subjects</b>                                | <b>N</b> | <b>Thickness (μm)</b> | <b>CE (Scheaffer)</b> |
| HDSD 18M IE Animal 1                           | 9728.314 | 21.68 ± 0.38          | 0.04                  |
| HDSD 18M IE Animal 2                           | 10257.77 | 23.54 ± 0.54          | 0.04                  |
| HDSD 18M IE Animal 3                           | 9624.171 | 22.37 ± 0.37          | 0.04                  |
| HDSD 18M IE Animal 4                           | 14611.54 | 25.74 ± 0.37          | 0.05                  |
| HDSD 18M IE Animal 5                           | 18124.54 | 25.74 ± 0.41          | 0.05                  |
| Mean                                           | 12469.27 | 23.81 ± 0.41          | 0.04                  |
| Standard Error                                 | 1689.22  | 0.84 ± 0.03           |                       |
| CV <sup>2</sup>                                | 0.092    |                       |                       |
| CE <sup>2</sup>                                | 0.002    |                       |                       |
| CE <sup>2</sup> / CV <sup>2</sup>              | 0.022    |                       |                       |
| CVB <sup>2</sup>                               | 0.090    |                       |                       |
| CVB <sup>2</sup> (% of CV <sup>2</sup> )       | 97.82%   |                       |                       |
| <b>HDSDHD / 18M / Impoverished Environment</b> |          |                       |                       |
| <b>Subjects</b>                                | <b>N</b> | <b>Thickness (μm)</b> | <b>CE (Scheaffer)</b> |
| HDSDHD 18M IE Animal 1                         | 17217.94 | 26.24 ± 1.14          | 0.05                  |
| HDSDHD 18M IE Animal 2                         | 14079.60 | 23.58 ± 0.96          | 0.04                  |
| HDSDHD 18M IE Animal 3                         | 13288.20 | 21.68 ± 0.63          | 0.03                  |
| HDSDHD 18M IE Animal 4                         | 17629.63 | 24.01 ± 1.04          | 0.05                  |
| HDSDHD 18M IE Animal 5                         | 15056.23 | 23.12 ± 1.05          | 0.04                  |
| Mean                                           | 15454.32 | 23.73 ± 0.96          | 0.04                  |
| Standard Error                                 | 853.90   | 0.74 ± 0.09           |                       |
| CV <sup>2</sup>                                | 0.015    |                       |                       |
| CE <sup>2</sup>                                | 0.002    |                       |                       |



|                                           |          |                       |                       |
|-------------------------------------------|----------|-----------------------|-----------------------|
| CE <sup>2</sup> / CV <sup>2</sup>         | 0.113    |                       |                       |
| CVB <sup>2</sup>                          | 0.014    |                       |                       |
| CVB <sup>2</sup> (% of CV <sup>2</sup> )  | 88.69%   |                       |                       |
| <b>HD / 6M / Enriched Environment</b>     |          |                       |                       |
| <b>Subjects</b>                           | <b>N</b> | <b>Thickness (μm)</b> | <b>CE (Scheaffer)</b> |
| HD 6M IE Animal 1                         | 14028.09 | 24.26 ± 0.60          | 0.04                  |
| HD 6M IE Animal 2                         | 11639.23 | 21.45 ± 0.27          | 0.04                  |
| HD 6M IE Animal 3                         | 12593.31 | 26.20 ± 0.57          | 0.04                  |
| HD 6M IE Animal 4                         | 14745.17 | 24.25 ± 1.05          | 0.04                  |
| HD 6M IE Animal 5                         | 14787.17 | 23.96 ± 0.41          | 0.03                  |
| Mean                                      | 13558.59 | 24.02 ± 0.58          | 0.04                  |
| Standard Error                            | 622.64   | 0.76 ± 0.13           |                       |
| CV <sup>2</sup>                           | 0.010    |                       |                       |
| CE <sup>2</sup>                           | 0.001    |                       |                       |
| CE <sup>2</sup> / CV <sup>2</sup>         | 0.132    |                       |                       |
| CVB <sup>2</sup>                          | 0.009    |                       |                       |
| CVB <sup>2</sup> (% of CV <sup>2</sup> )  | 86.81%   |                       |                       |
| <b>HDSD / 6M / Enriched Environment</b>   |          |                       |                       |
| <b>Subjects</b>                           | <b>N</b> | <b>Thickness (μm)</b> | <b>CE (Scheaffer)</b> |
| HDSD 6M IE Animal 1                       | 12729.43 | 25.51 ± 0.97          | 0.04                  |
| HDSD 6M IE Animal 2                       | 13585.63 | 22.26 ± 0.59          | 0.04                  |
| HDSD 6M IE Animal 3                       | 13139.66 | 23.74 ± 1.00          | 0.03                  |
| HDSD 6M IE Animal 4                       | 18052.8  | 24.25 ± 0.87          | 0.03                  |
| HDSD 6M IE Animal 5                       | 16848.6  | 27.20 ± 0.53          | 0.04                  |
| Mean                                      | 14871.22 | 24.59 ± 0.79          | 0.04                  |
| Standard Error                            | 1078.68  | 0.83 ± 0.1            |                       |
| CV <sup>2</sup>                           | 0.030    |                       |                       |
| CE <sup>2</sup>                           | 0.001    |                       |                       |
| CE <sup>2</sup> / CV <sup>2</sup>         | 0.052    |                       |                       |
| CVB <sup>2</sup>                          | 0.025    |                       |                       |
| CVB <sup>2</sup> (% of CV <sup>2</sup> )  | 94.8%    |                       |                       |
| <b>HDSDHD / 6M / Enriched Environment</b> |          |                       |                       |
| <b>Subjects</b>                           | <b>N</b> | <b>Thickness (μm)</b> | <b>CE (Scheaffer)</b> |
| HDSDHD 6M IE Animal 1                     | 15753    | 21 ± 0.9              | 0.04                  |

|                                          |          |                       |                       |
|------------------------------------------|----------|-----------------------|-----------------------|
| HDSDHD 6M IE Animal 2                    | 10886.83 | 21.08 ± 0.24          | 0.04                  |
| HDSDHD 6M IE Animal 3                    | 11038.9  | 24.24 ± 0.56          | 0.04                  |
| HDSDHD 6M IE Animal 4                    | 11992.8  | 25.31 ± 0.22          | 0.04                  |
| HDSDHD 6M IE Animal 5                    | 12601.2  | 25.37 ± 0.5           | 0.04                  |
| Mean                                     | 12454.5  | 23.4 ± 0.49           | 0.04                  |
| Standard Error                           | 882.5    | 0.99 ± 0.12           |                       |
| CV <sup>2</sup>                          | 0.025    |                       |                       |
| CE <sup>2</sup>                          | 0.002    |                       |                       |
| CE <sup>2</sup> / CV <sup>2</sup>        | 0.064    |                       |                       |
| CVB <sup>2</sup>                         | 0.023    |                       |                       |
| CVB <sup>2</sup> (% of CV <sup>2</sup> ) | 93.6%    |                       |                       |
| <b>HD / 18M / Enriched Environment</b>   |          |                       |                       |
| <b>Subjects</b>                          | <b>N</b> | <b>Thickness (μm)</b> | <b>CE (Scheaffer)</b> |
| HD 18M IE Animal 1                       | 12827.5  | 25.77 ± 0.91          | 0.05                  |
| HD 18M IE Animal 2                       | 11742.9  | 25.24 ± 0.66          | 0.04                  |
| HD 18M IE Animal 3                       | 11182.8  | 26.92 ± 0.23          | 0.05                  |
| HD 18M IE Animal 4                       | 13611.3  | 24.58 ± 0.58          | 0.04                  |
| HD 18M IE Animal 5                       | 11620.4  | 26.37 ± 1.62          | 0.04                  |
| Mean                                     | 12196.97 | 25.77 ± 0.8           | 0.04                  |
| Standard Error                           | 445.3    | 0.41 ± 0.23           |                       |
| CV <sup>2</sup>                          | 0.007    |                       |                       |
| CE <sup>2</sup>                          | 0.002    |                       |                       |
| CE <sup>2</sup> / CV <sup>2</sup>        | 0.300    |                       |                       |
| CVB <sup>2</sup>                         | 0.005    |                       |                       |
| CVB <sup>2</sup> (% of CV <sup>2</sup> ) | 71.08%   |                       |                       |
| <b>HDSD / 18M / Enriched Environment</b> |          |                       |                       |
| <b>Subjects</b>                          | <b>N</b> | <b>Thickness (μm)</b> | <b>CE (Scheaffer)</b> |
| HDSD 18M IE Animal 1                     | 14610.6  | 24.3 ± 0.39           | 0.03                  |
| HDSD 18M IE Animal 2                     | 20168.91 | 26.11 ± 0.44          | 0.03                  |
| HDSD 18M IE Animal 3                     | 9718.11  | 25.3 ± 0.58           | 0.05                  |
| HDSD 18M IE Animal 4                     | 16181.83 | 25.27 ± 0.48          | 0.03                  |
| HDSD 18M IE Animal 5                     | 15019.63 | 26 ± 0.67             | 0.04                  |
| Mean                                     | 15139.82 | 25.39 ± 0.51          | 0.04                  |
| Standard Error                           | 1674.32  | 0.33 ± 0.05           |                       |

|                                            |          |                       |                       |
|--------------------------------------------|----------|-----------------------|-----------------------|
| CV <sup>2</sup>                            | 0.153    |                       |                       |
| CE <sup>2</sup>                            | 0.004    |                       |                       |
| CE <sup>2</sup> / CV <sup>2</sup>          | 0.024    |                       |                       |
| CVB <sup>2</sup>                           | 0.149    |                       |                       |
| CVB <sup>2</sup> (% of CV <sup>2</sup> )   | 97.6%    |                       |                       |
| <b>HDSDHD / 18M / Enriched Environment</b> |          |                       |                       |
| <b>Subjects</b>                            | <b>N</b> | <b>Thickness (μm)</b> | <b>CE (Scheaffer)</b> |
| HDSDHD 18M IE Animal 1                     | 13603.63 | 25.96 ± 0.71          | 0.04                  |
| HDSDHD 18M IE Animal 2                     | 11730.09 | 26.01 ± 0.57          | 0.04                  |
| HDSDHD 18M IE Animal 3                     | 15370.2  | 24.15 ± 0.57          | 0.03                  |
| HDSDHD 18M IE Animal 4                     | 11822.4  | 23.79 ± 0.64          | 0.04                  |
| HDSDHD 18M IE Animal 5                     | 17941.54 | 25.36 ± 0.63          | 0.03                  |
| Mean                                       | 14093.57 | 25.05 ± 0.62          | 0.04                  |
| Standard Error                             | 1170.92  | 0.46 ± 0.03           |                       |
| CV <sup>2</sup>                            | 0.035    |                       |                       |
| CE <sup>2</sup>                            | 0.001    |                       |                       |
| CE <sup>2</sup> / CV <sup>2</sup>          | 0.039    |                       |                       |
| CVB <sup>2</sup>                           | 0.033    |                       |                       |
| CVB <sup>2</sup> (% of CV <sup>2</sup> )   | 96.09%   |                       |                       |

CVB<sup>2</sup>= CV<sup>2</sup> – CE<sup>2</sup> (CV, coefficient of variation; CVB, biological coefficient of variation; CE, coefficient of error). N = number of astrocytes; Mean = mean numbers in each group; 6M and 18M indicate 6 months old and 18 months old, respectively.

Table S3. Estimated Unilateral Numbers of Astrocytes (N) With the Coefficient of Error (CE) for the Stratum Oriens of CA1 of 6-, and 18-Month-Old Female Albino Swiss Mice Fed a Hard Diet (HD), Hard/Soft Diet (HD/SD) and Hard/Soft/Hard Diet (HDSDHD).

| <b>STRATUM ORIENS – CA1</b>                   |          |                       |                       |
|-----------------------------------------------|----------|-----------------------|-----------------------|
| <b>HD / 6M / Impoverished Environment</b>     |          |                       |                       |
| <b>Subjects</b>                               | <b>N</b> | <b>Thickness (μm)</b> | <b>CE (Scheaffer)</b> |
| HD 6M IE Animal 1                             | 7139.47  | 23.01 ± 1.96          | 0.05                  |
| HD 6M IE Animal 2                             | 12993.6  | 24.62 ± 0.40          | 0.04                  |
| HD 6M IE Animal 3                             | 17970.6  | 22.21 ± 0.50          | 0.03                  |
| HD 6M IE Animal 4                             | 12052.54 | 24.43 ± 0.46          | 0.04                  |
| HD 6M IE Animal 5                             | 10467.6  | 22.69 ± 0.55          | 0.04                  |
| Mean                                          | 12124.77 | 23.39 ± 0.78          | 0.05                  |
| Standard Error                                | 1768.23  | 0.48 ± 0.30           |                       |
| CV <sup>2</sup>                               | 0.106    |                       |                       |
| CE <sup>2</sup>                               | 0.002    |                       |                       |
| CE <sup>2</sup> / CV <sup>2</sup>             | 0.020684 |                       |                       |
| CVB <sup>2</sup>                              | 0.104    |                       |                       |
| CVB <sup>2</sup> (% of CV <sup>2</sup> )      | 97.93%   |                       |                       |
| <b>HDSD / 6M / Impoverished Environment</b>   |          |                       |                       |
| <b>Subjects</b>                               | <b>N</b> | <b>Thickness (μm)</b> | <b>CE (Scheaffer)</b> |
| HDSD 6M IE Animal 1                           | 8268.43  | 22.53 ± 1.17          | 0.05                  |
| HDSD 6M IE Animal 2                           | 11327.14 | 23.82 ± 1.03          | 0.05                  |
| HDSD 6M IE Animal 3                           | 6915.43  | 21.79 ± 0.71          | 0.05                  |
| HDSD 6M IE Animal 4                           | 9443.31  | 22.60 ± 0.29          | 0.04                  |
| HDSD 6M IE Animal 5                           | 11758.46 | 24.96 ± 0.26          | 0.04                  |
| Mean                                          | 9542.55  | 23.14 ± 0.70          | 0.05                  |
| Standard Error                                | 911.87   | 0.56 ± 0.19           |                       |
| CV <sup>2</sup>                               | 0.046    |                       |                       |
| CE <sup>2</sup>                               | 0.002    |                       |                       |
| CE <sup>2</sup> / CV <sup>2</sup>             | 0.050    |                       |                       |
| CVB <sup>2</sup>                              | 0.043    |                       |                       |
| CVB <sup>2</sup> (% of CV <sup>2</sup> )      | 94.97%   |                       |                       |
| <b>HDSDHD / 6M / Impoverished Environment</b> |          |                       |                       |
| <b>Subjects</b>                               | <b>N</b> | <b>Thickness (μm)</b> | <b>CE (Scheaffer)</b> |
| HDSDHD 6M IE Animal 1                         | 15625.71 | 24.55 ± 1.07          | 0.04                  |
| HDSDHD 6M IE Animal 2                         | 7799.06  | 21.78 ± 0.44          | 0.05                  |
| HDSDHD 6M IE Animal 3                         | 11307.34 | 21.54 ± 0.72          | 0.04                  |

|                                              |          |                       |                       |
|----------------------------------------------|----------|-----------------------|-----------------------|
| HDSDHD 6M IE Animal 4                        | 10604.91 | 23.41 ± 0.49          | 0.05                  |
| HDSDHD 6M IE Animal 5                        | 8830.11  | 20.26 ± 0.94          | 0.05                  |
| Mean                                         | 10833.43 | 22.31 ± 0.73          | 0.05                  |
| Standard Error                               | 1350.25  | 0.75 ± 0.12           |                       |
| CV <sup>2</sup>                              | 0.077    |                       |                       |
| CE <sup>2</sup>                              | 0.002    |                       |                       |
| CE <sup>2</sup> / CV <sup>2</sup>            | 0.029    |                       |                       |
| CVB <sup>2</sup>                             | 0.075    |                       |                       |
| CVB <sup>2</sup> (% of CV <sup>2</sup> )     | 97.14%   |                       |                       |
| <b>HD / 18M / Impoverished Environment</b>   |          |                       |                       |
| <b>Subjects</b>                              | <b>N</b> | <b>Thickness (μm)</b> | <b>CE (Scheaffer)</b> |
| HD 18M IE Animal 1                           | 7948.87  | 24.86 ± 0.53          | 0.05                  |
| HD 18M IE Animal 2                           | 9246.07  | 25.58 ± 0.50          | 0.06                  |
| HD 18M IE Animal 3                           | 8324.66  | 26.54 ± 0.39          | 0.06                  |
| HD 18M IE Animal 4                           | 5981.14  | 24.36 ± 0.11          | 0.06                  |
| HD 18M IE Animal 5                           | 7076.57  | 23.8 ± 0.37           | 0.06                  |
| Mean                                         | 7715.47  | 25.03 ± 0.38          | 0.06                  |
| Standard Error                               | 556.08   | 0.48 ± 0.07           | 0.05                  |
| CV <sup>2</sup>                              | 0.026    |                       |                       |
| CE <sup>2</sup>                              | 0.003    |                       |                       |
| CE <sup>2</sup> / CV <sup>2</sup>            | 0.130    |                       |                       |
| CVB <sup>2</sup>                             | 0.023    |                       |                       |
| CVB <sup>2</sup> (% of CV <sup>2</sup> )     | 87%      |                       |                       |
| <b>HDSD / 18M / Impoverished Environment</b> |          |                       |                       |
| <b>Subjects</b>                              | <b>N</b> | <b>Thickness (μm)</b> | <b>CE (Scheaffer)</b> |
| HDSD 18M IE Animal 1                         | 6024.51  | 21.98 ± 0.28          | 0.06                  |
| HDSD 18M IE Animal 2                         | 8267.31  | 25.11 ± 0.36          | 0.05                  |
| HDSD 18M IE Animal 3                         | 7449.51  | 22.89 ± 0.37          | 0.05                  |
| HDSD 18M IE Animal 4                         | 18419.83 | 26.31 ± <b>0.51</b>   | 0.05                  |
| HDSD 18M IE Animal 5                         | 20229.94 | 26.13 ± <b>0.29</b>   | 0.04                  |
| Mean                                         | 12078.22 | 24.49 ± 0.36          | 0.05                  |
| Standard Error                               | 2993.84  | 0.87 ± 0.04           |                       |
| CV <sup>2</sup>                              | 0.307    |                       |                       |
| CE <sup>2</sup>                              | 0.003    |                       |                       |

|                                                |          |                                             |                       |
|------------------------------------------------|----------|---------------------------------------------|-----------------------|
| $CE^2 / CV^2$                                  | 0.009    |                                             |                       |
| $CVB^2$                                        | 0.304    |                                             |                       |
| $CVB^2$ (% of $CV^2$ )                         | 99.11%   |                                             |                       |
| <b>HDSDHD / 18M / Impoverished Environment</b> |          |                                             |                       |
| <b>Subjects</b>                                | <b>N</b> | <b>Thickness (<math>\mu\text{m}</math>)</b> | <b>CE (Scheaffer)</b> |
| HDSDHD 18M IE Animal 1                         | 16090.29 | $26.86 \pm 0.95$                            | 0.05                  |
| HDSDHD 18M IE Animal 2                         | 12443.14 | $25.05 \pm 1.01$                            | 0.05                  |
| HDSDHD 18M IE Animal 3                         | 8401.37  | $22.03 \pm 0.72$                            | 0.05                  |
| HDSDHD 18M IE Animal 4                         | 17359.29 | $176.86 \pm 151.76$                         | 0.05                  |
| HDSDHD 18M IE Animal 5                         | 10174.54 | $23.93 \pm 0.95$                            | 0.05                  |
| Mean                                           | 12893.73 | $54.95 \pm 31.08$                           | 0.05                  |
| Standard Error                                 | 1702.02  | $30.49 \pm 30.17$                           | 0.05                  |
| $CV^2$                                         | 0.087    |                                             |                       |
| $CE^2$                                         | 0.002    |                                             |                       |
| $CE^2 / CV^2$                                  | 0.027    |                                             |                       |
| $CVB^2$                                        | 0.085    |                                             |                       |
| $CVB^2$ (% of $CV^2$ )                         | 97.32%   |                                             |                       |
| <b>HD / 6M / Enriched Environment</b>          |          |                                             |                       |
| <b>Subjects</b>                                | <b>N</b> | <b>Thickness (<math>\mu\text{m}</math>)</b> | <b>CE (Scheaffer)</b> |
| HD 6M EE Animal 1                              | 13084.29 | $23.62 \pm 0.32$                            | 0.04                  |
| HD 6M EE Animal 2                              | 7827.943 | $22.41 \pm 0.48$                            | 0.05                  |
| HD 6M EE Animal 3                              | 13229.31 | $26.65 \pm 0.36$                            | 0.04                  |
| HD 6M EE Animal 4                              | 11662.03 | $25.80 \pm 0.92$                            | 0.05                  |
| HD 6M EE Animal 5                              | 15107.31 | $25.31 \pm 0.64$                            | 0.04                  |
| Mean                                           | 12182.18 | $24.76 \pm 0.54$                            | 0.04                  |
| Standard Error                                 | 1218.54  | $0.77 \pm 0.11$                             |                       |
| $CV^2$                                         | 0.050    |                                             |                       |
| $CE^2$                                         | 0.002    |                                             |                       |
| $CE^2 / CV^2$                                  | 0.039    |                                             |                       |
| $CVB^2$                                        | 0.048    |                                             |                       |
| $CVB^2$ (% of $CV^2$ )                         | 96.07%   |                                             |                       |
| <b>HDSD / 6M / Enriched Environment</b>        |          |                                             |                       |
| <b>Subjects</b>                                | <b>N</b> | <b>Thickness (<math>\mu\text{m}</math>)</b> | <b>CE (Scheaffer)</b> |

|                                           |          |                       |                       |
|-------------------------------------------|----------|-----------------------|-----------------------|
| HDSD 6M EE Animal 1                       | 9346.11  | 25.61 ± 0.86          | 0.06                  |
| HDSD 6M EE Animal 2                       | 9700.03  | 22.60 ± 0.55          | 0.05                  |
| HDSD 6M EE Animal 3                       | 10650.69 | 23.61 ± 0.93          | 0.05                  |
| HDSD 6M EE Animal 4                       | 15628.97 | 24.86 ± 0.75          | 0.04                  |
| HDSD 6M EE Animal 5                       | 13275.86 | 27.47 ± 0.43          | 0.05                  |
| Mean                                      | 11720.33 | 24.83 ± 0.70          | 0.05                  |
| Standard Error                            | 1194.99  | 0.84 ± 0.09           |                       |
| CV <sup>2</sup>                           | 0.052    |                       |                       |
| CE <sup>2</sup>                           | 0.003    |                       |                       |
| CE <sup>2</sup> / CV <sup>2</sup>         | 0.051    |                       |                       |
| CVB <sup>2</sup>                          | 0.049    |                       |                       |
| CVB <sup>2</sup> (% of CV <sup>2</sup> )  | 94.94%   |                       |                       |
| <b>HDSDHD / 6M / Enriched Environment</b> |          |                       |                       |
| <b>Subjects</b>                           | <b>N</b> | <b>Thickness (μm)</b> | <b>CE (Scheaffer)</b> |
| HDSDHD 6M EE Animal 1                     | 9493.02  | 21.18 ± 0.77          | 0.05                  |
| HDSDHD 6M EE Animal 2                     | 7589.31  | 21.24 ± 0.52          | 0.05                  |
| HDSDHD 6M EE Animal 3                     | 8884.97  | 24.54 ± 0.28          | 0.05                  |
| HDSDHD 6M EE Animal 4                     | 10250.49 | 25.53 ± 0.41          | 0.06                  |
| HDSDHD 6M EE Animal 5                     | 11534.14 | 25.00 ± 0.32          | 0.05                  |
| Mean                                      | 9550.39  | 23.50 ± 0.46          | 0.05                  |
| Standard Error                            | 660.20   | 0.95 ± 0.09           |                       |
| CV <sup>2</sup>                           | 0.024    |                       |                       |
| CE <sup>2</sup>                           | 0.003    |                       |                       |
| CE <sup>2</sup> / CV <sup>2</sup>         | 0.111    |                       |                       |
| CVB <sup>2</sup>                          | 0.021    |                       |                       |
| CVB <sup>2</sup> (% of CV <sup>2</sup> )  | 88.94%   |                       |                       |
| <b>HD / 18M / Enriched Environment</b>    |          |                       |                       |
| <b>Subjects</b>                           | <b>N</b> | <b>Thickness (μm)</b> | <b>CE (Scheaffer)</b> |
| HD 18M EE Animal 1                        | 11814.69 | 26.50 ± 1.06          | 0.06                  |
| HD 18M EE Animal 2                        | 10945.37 | 25.63 ± 0.72          | 0.05                  |
| HD 18M EE Animal 3                        | 8336.14  | 25.46 ± 0.22          | 0.05                  |
| HD 18M EE Animal 4                        | 9057.17  | 24.62 ± 0.58          | 0.05                  |
| HD 18M EE Animal 5                        | 8474.57  | 26.71 ± 1.31          | 0.05                  |
| Mean                                      | 9725.59  | 25.79 ± 0.78          | 0.05                  |

|                                            |          |                       |                       |
|--------------------------------------------|----------|-----------------------|-----------------------|
| Standard Error                             | 699.81   | 0.38 ± 0.19           |                       |
| CV <sup>2</sup>                            | 0.026    |                       |                       |
| CE <sup>2</sup>                            | 0.003    |                       |                       |
| CE <sup>2</sup> / CV <sup>2</sup>          | 0.11     |                       |                       |
| CVB <sup>2</sup>                           | 0.023    |                       |                       |
| CVB <sup>2</sup> (% of CV <sup>2</sup> )   | 89.03%   |                       |                       |
| <b>HDSD / 18M / Enriched Environment</b>   |          |                       |                       |
| <b>Subjects</b>                            | <b>N</b> | <b>Thickness (μm)</b> | <b>CE (Scheaffer)</b> |
| HDSD 18M EE Animal 1                       | 12923.31 | 24.62 ± 0.56          | 0.04                  |
| HDSD 18M EE Animal 2                       | 18113.40 | 26.84 ± 0.19          | 0.04                  |
| HDSD 18M EE Animal 3                       | 8500.29  | 25.77 ± 0.17          | 0.05                  |
| HDSD 18M EE Animal 4                       | 12517.20 | 25.24 ± 0.65          | 0.04                  |
| HDSD 18M EE Animal 5                       | 12929.74 | 26.76 ± 0.28          | 0.05                  |
| Mean                                       | 12996.79 | 25.85 ± 0.37          | 0.04                  |
| Standard Error                             | 1527.06  | 0.43 ± 0.1            |                       |
| CV <sup>2</sup>                            | 0.069    |                       |                       |
| CE <sup>2</sup>                            | 0.002    |                       |                       |
| CE <sup>2</sup> / CV <sup>2</sup>          | 0.03     |                       |                       |
| CVB <sup>2</sup>                           | 0.067    |                       |                       |
| CVB <sup>2</sup> (% of CV <sup>2</sup> )   | 97.12%   |                       |                       |
| <b>HDSDHD / 18M / Enriched Environment</b> |          |                       |                       |
| <b>Subjects</b>                            | <b>N</b> | <b>Thickness (μm)</b> | <b>CE (Scheaffer)</b> |
| HDSDHD 18M EE Animal 1                     | 13448.23 | 25.91 ± 0.70          | 0.04                  |
| HDSDHD 18M EE Animal 2                     | 8800.63  | 26.66 ± 0.66          | 0.05                  |
| HDSDHD 18M EE Animal 3                     | 12913.71 | 23.75 ± 0.67          | 0.04                  |
| HDSDHD 18M EE Animal 4                     | 8741.74  | 24.21 ± 1.06          | 0.05                  |
| HDSDHD 18M EE Animal 5                     | 13401.60 | 24.95 ± 0.55          | 0.04                  |
| Mean                                       | 11461.18 | 25.09 ± 0.73          | 0.04                  |
| Standard Error                             | 1102.21  | 0.54 ± 0.09           |                       |
| CV <sup>2</sup>                            | 0.046    |                       |                       |
| CE <sup>2</sup>                            | 0.002    |                       |                       |
| CE <sup>2</sup> / CV <sup>2</sup>          | 0.043    |                       |                       |
| CVB <sup>2</sup>                           | 0.044    |                       |                       |
| CVB <sup>2</sup> (% of CV <sup>2</sup> )   | 95.66%   |                       |                       |



$CVB^2 = CV^2 - CE^2$  (CV, coefficient of variation; CVB, biological coefficient of variation; CE, coefficient of error). N = number of astrocytes; Mean = mean numbers in each group; 6M and 18M indicate 6 months old and 18 months old, respectively.

Table S4. Estimated Unilateral Numbers of Astrocytes (N) With the Coefficient of Error (CE) for the Stratum Lacunosum-Moleculare of CA3 of 6-, and 18-Month-Old Female Albino Swiss Mice Fed a Hard Diet (HD), Hard/Soft Diet (HD/SD) and Hard/Soft/Hard Diet (HDSHD).

| <b><u>STRATUM LACUNOSUM-MOLECULARE – CA3</u></b> |          |                       |                       |
|--------------------------------------------------|----------|-----------------------|-----------------------|
| <b>HD / 6M / Impoverished Environment</b>        |          |                       |                       |
| <b>Subjects</b>                                  | <b>N</b> | <b>Thickness (μm)</b> | <b>CE (Scheaffer)</b> |
| HD 6M IE Animal 1                                | 5033.44  | 32.51 ± 1.38          | 0.10                  |
| HD 6M IE Animal 2                                | 6175.80  | 21.71 ± 0.26          | 0.06                  |
| HD 6M IE Animal 3                                | 6952.50  | 25.18 ± 0.41          | 0.06                  |
| HD 6M IE Animal 4                                | 7842.05  | 34.72 ± 1.07          | 0.06                  |
| HD 6M IE Animal 5                                | 5918.57  | 25.46 ± 0.61          | 0.07                  |
| Mean                                             | 6384.47  | 27.92 ± 0.75          | 0.07                  |
| Standard Error                                   | 476.08   | 2.44 ± 0.21           |                       |
| CV <sup>2</sup>                                  | 0.028    |                       |                       |
| CE <sup>2</sup>                                  | 0.005    |                       |                       |
| CE <sup>2</sup> / CV <sup>2</sup>                | 0.177    |                       |                       |

|                                               |          |                       |                       |
|-----------------------------------------------|----------|-----------------------|-----------------------|
| CVB <sup>2</sup>                              | 0.023    |                       |                       |
| CVB <sup>2</sup> (% of CV <sup>2</sup> )      | 82.33%   |                       |                       |
| <b>HDSD / 6M / Impoverished Environment</b>   |          |                       |                       |
| <b>Subjects</b>                               | <b>N</b> | <b>Thickness (μm)</b> | <b>CE (Scheaffer)</b> |
| HDSD 6M IE Animal 1                           | 7452.72  | 23.21 ± 1.03          | 0.05                  |
| HDSD 6M IE Animal 2                           | 5296.34  | 19.63 ± 1.12          | 0.06                  |
| HDSD 6M IE Animal 3                           | 8461.34  | 25.32 ± 0.85          | 0.05                  |
| HDSD 6M IE Animal 4                           | 7997.01  | 21.85 ± 1.44          | 0.05                  |
| HDSD 6M IE Animal 5                           | 7149.91  | 26.08 ± 1.12          | 0.06                  |
| Mean                                          | 7271.46  | 23.51 ± 0.71          | 0.05                  |
| Standard Error                                | 542.72   | 1.17 ± 0.1            |                       |
| CV <sup>2</sup>                               | 0.028    |                       |                       |
| CE <sup>2</sup>                               | 0.003    |                       |                       |
| CE <sup>2</sup> / CV <sup>2</sup>             | 0.108    |                       |                       |
| CVB <sup>2</sup>                              | 0.025    |                       |                       |
| CVB <sup>2</sup> (% of CV <sup>2</sup> )      | 89.22%   |                       |                       |
| <b>HDSDHD / 6M / Impoverished Environment</b> |          |                       |                       |
| <b>Subjects</b>                               | <b>N</b> | <b>Thickness (μm)</b> | <b>CE (Scheaffer)</b> |
| HDSDHD 6M IE Animal 1                         | 9259.55  | 21.24 ± 0.95          | 0.05                  |
| HDSDHD 6M IE Animal 2                         | 18258.08 | 25.17 ± 0.73          | 0.04                  |
| HDSDHD 6M IE Animal 3                         | 5498.17  | 14.72 ± 0.6           | 0.05                  |
| HDSDHD 6M IE Animal 4                         | 8258.57  | 24.63 ± 0.93          | 0.05                  |
| HDSDHD 6M IE Animal 5                         | 4982.95  | 16.95 ± 0.94          | 0.06                  |
| Mean                                          | 9251.46  | 20.54 ± 0.83          | 0.05                  |
| Standard Error                                | 2391.78  | 2.07 ± 0.07           |                       |
| CV <sup>2</sup>                               | 0.334    |                       |                       |

|                                              |          |                       |                       |
|----------------------------------------------|----------|-----------------------|-----------------------|
| CE <sup>2</sup>                              | 0.003    |                       |                       |
| CE <sup>2</sup> / CV <sup>2</sup>            | 0.008    |                       |                       |
| CVB <sup>2</sup>                             | 0.332    |                       |                       |
| CVB <sup>2</sup> (% of CV <sup>2</sup> )     | 99.24%   |                       |                       |
| <b>HD / 18M / Impoverished Environment</b>   |          |                       |                       |
| <b>Subjects</b>                              | <b>N</b> | <b>Thickness (μm)</b> | <b>CE (Scheaffer)</b> |
| HD 18M IE Animal 1                           | 15423.60 | 24.53 ± 0.43          | 0.04                  |
| HD 18M IE Animal 2                           | 6012.99  | 26.29 ± 0.14          | 0.06                  |
| HD 18M IE Animal 3                           | 6774.91  | 21.44 ± 1.62          | 0.06                  |
| HD 18M IE Animal 4                           | 13415.09 | 22.85 ± 0.08          | 0.04                  |
| HD 18M IE Animal 5                           | 6732.19  | 20.1 ± 1.7            | 0.06                  |
| Mean                                         | 9671.76  | 23.04 ± 0.79          | 0.05                  |
| Standard Error                               | 1968.70  | 1.1 ± 0.36            |                       |
| CV <sup>2</sup>                              | 0.207    |                       |                       |
| CE <sup>2</sup>                              | 0.003    |                       |                       |
| CE <sup>2</sup> / CV <sup>2</sup>            | 0.013    |                       |                       |
| CVB <sup>2</sup>                             | 0.205    |                       |                       |
| CVB <sup>2</sup> (% of CV <sup>2</sup> )     | 98.75%   |                       |                       |
| <b>HDSD / 18M / Impoverished Environment</b> |          |                       |                       |
| <b>Subjects</b>                              | <b>N</b> | <b>Thickness (μm)</b> | <b>CE (Scheaffer)</b> |
| HDSD 18M IE Animal 1                         | 7451.57  | 20.32 ± 0.47          | 0.04                  |
| HDSD 18M IE Animal 2                         | 13070.89 | 21.17 ± 1.18          | 0.04                  |
| HDSD 18M IE Animal 3                         | 5378.97  | 16.28 ± 1.23          | 0.06                  |
| HDSD 18M IE Animal 4                         | 12510.54 | 22.48 ± 0.18          | 0.05                  |
| HDSD 18M IE Animal 5                         | 13125.94 | 25.59 ± 0.52          | 0.05                  |
| Mean                                         | 10307.58 | 21.17 ± 0.72          | 0.05                  |

|                                                |          |                       |                       |
|------------------------------------------------|----------|-----------------------|-----------------------|
| Standard Error                                 | 1626.04  | 1.52 ± 0.21           |                       |
| CV <sup>2</sup>                                | 0.124    |                       |                       |
| CE <sup>2</sup>                                | 0.002    |                       |                       |
| CE <sup>2</sup> / CV <sup>2</sup>              | 0.018    |                       |                       |
| CVB <sup>2</sup>                               | 0.122    |                       |                       |
| CVB <sup>2</sup> (% of CV <sup>2</sup> )       | 98.17%   |                       |                       |
| <b>HDSDHD / 18M / Impoverished Environment</b> |          |                       |                       |
| <b>Subjects</b>                                | <b>N</b> | <b>Thickness (µm)</b> | <b>CE (Scheaffer)</b> |
| HDSDHD 18M IE Animal 1                         | 16206.96 | 26.07 ± 0.9           | 0.04                  |
| HDSDHD 18M IE Animal 2                         | 14815.85 | 26.28 ± 0.42          | 0.04                  |
| HDSDHD 18M IE Animal 3                         | 4638.35  | 14.51 ± 0.49          | 0.06                  |
| HDSDHD 18M IE Animal 4                         | 12920.49 | 22.68 ± 0.19          | 0.05                  |
| HDSDHD 18M IE Animal 5                         | 5780.36  | 20.01 ± 1.35          | 0.06                  |
| Mean                                           | 10872.40 | 21.91 ± 0.67          | 0.05                  |
| Standard Error                                 | 2376.92  | 2.18 ± 0.21           |                       |
| CV <sup>2</sup>                                | 0.239    |                       |                       |
| CE <sup>2</sup>                                | 0.002    |                       |                       |
| CE <sup>2</sup> / CV <sup>2</sup>              | 0.010    |                       |                       |
| CVB <sup>2</sup>                               | 0.237    |                       |                       |
| CVB <sup>2</sup> (% of CV <sup>2</sup> )       | 98.99%   |                       |                       |
| <b>HD / 6M / Enriched Environment</b>          |          |                       |                       |
| <b>Subjects</b>                                | <b>N</b> | <b>Thickness (µm)</b> | <b>CE (Scheaffer)</b> |
| HD 6M EE Animal 1                              | 10657.77 | 21.73 ± 1             | 0.05                  |
| HD 6M EE Animal 2                              | 7652.81  | 21.69 ± 0.2           | 0.06                  |
| HD 6M EE Animal 3                              | 4886.57  | 22.08 ± 0.74          | 0.07                  |
| HD 6M EE Animal 4                              | 9336.43  | 22.08 ± 0.74          | 0.04                  |
| HD 6M EE Animal 5                              | 9162.46  | 18.57 ± 0.93          | 0.05                  |
| Mean                                           | 8339.21  | 20.95 ± 0.68          | 0.05                  |
| Standard Error                                 | 985.89   | 0.64 ± 0.14           |                       |

|                                           |          |                       |                       |
|-------------------------------------------|----------|-----------------------|-----------------------|
| CV <sup>2</sup>                           | 0.054    |                       |                       |
| CE <sup>2</sup>                           | 0.003    |                       |                       |
| CE <sup>2</sup> / CV <sup>2</sup>         | 0.050    |                       |                       |
| CVB <sup>2</sup>                          | 0.052    |                       |                       |
| CVB <sup>2</sup> (% of CV <sup>2</sup> )  | 95.01%   |                       |                       |
| <b>HDSD / 6M / Enriched Environment</b>   |          |                       |                       |
| <b>Subjects</b>                           | <b>N</b> | <b>Thickness (μm)</b> | <b>CE (Scheaffer)</b> |
| HDSD 6M EE Animal 1                       | 7573.13  | 24.54 ± 0.51          | 0.05                  |
| HDSD 6M EE Animal 2                       | 7687.63  | 18.17 ± 1.77          | 0.05                  |
| HDSD 6M EE Animal 3                       | 7360.45  | 22.24 ± 0.25          | 0.07                  |
| HDSD 6M EE Animal 4                       | 7478.44  | 22.65 ± 1.23          | 0.06                  |
| Mean                                      | 7524.91  | 21.90 ± 0.94          | 0.06                  |
| Standard Error                            | 69.53    | 1.34 ± 0.35           |                       |
| CV <sup>2</sup>                           | 0.0003   |                       |                       |
| CE <sup>2</sup>                           | 0.003    |                       |                       |
| CE <sup>2</sup> / CV <sup>2</sup>         | 9.249    |                       |                       |
| CVB <sup>2</sup>                          | -0.003   |                       |                       |
| CVB <sup>2</sup> (% of CV <sup>2</sup> )  | -824.87% |                       |                       |
| <b>HDSDHD / 6M / Enriched Environment</b> |          |                       |                       |
| <b>Subjects</b>                           | <b>N</b> | <b>Thickness (μm)</b> | <b>CE (Scheaffer)</b> |
| HDSDHD 6M EE Animal 1                     | 8246.25  | 24.42 ± 0.59          | 0.05                  |
| HDSDHD 6M EE Animal 2                     | 7720.45  | 19.73 ± 1.62          | 0.05                  |
| HDSDHD 6M EE Animal 3                     | 6861.96  | 18.03 ± 0.98          | 0.06                  |
| HDSDHD 6M EE Animal 4                     | 8391.70  | 22.7 ± 0.09           | 0.06                  |
| HDSDHD 6M EE Animal 5                     | 6701.12  | 22.3 ± 1.21           | 0.05                  |
| Mean                                      | 7584.29  | 21.43 ± 0.9           | 0.05                  |
| Standard Error                            | 347.16   | 1.13 ± 0.26           |                       |
| CV <sup>2</sup>                           | 2.479    |                       |                       |
| CE <sup>2</sup>                           | 0.003    |                       |                       |

|                                          |          |                                             |                       |
|------------------------------------------|----------|---------------------------------------------|-----------------------|
| $CE^2 / CV^2$                            | 0.001    |                                             |                       |
| $CVB^2$                                  | 2.476    |                                             |                       |
| $CVB^2$ (% of $CV^2$ )                   | 99.88%   |                                             |                       |
| <b>HD / 18M / Enriched Environment</b>   |          |                                             |                       |
| <b>Subjects</b>                          | <b>N</b> | <b>Thickness (<math>\mu\text{m}</math>)</b> | <b>CE (Scheaffer)</b> |
| HD 18M EE Animal 1                       | 6193.39  | $23.99 \pm 0.16$                            | 0.06                  |
| HD 18M EE Animal 2                       | 10397.41 | $22.3 \pm 0.45$                             | 0.05                  |
| HD 18M EE Animal 3                       | 8002.37  | $19.9 \pm 1.42$                             | 0.06                  |
| HD 18M EE Animal 4                       | 12435.54 | $22.53 \pm 0.09$                            | 0.05                  |
| HD 18M EE Animal 5                       | 5634.91  | $18.78 \pm 1.31$                            | 0.06                  |
| Mean                                     | 8532.72  | $21.5 \pm 0.69$                             | 0.05                  |
| Standard Error                           | 1281.80  | $0.95 \pm 0.28$                             |                       |
| $CV^2$                                   | 0.113    |                                             |                       |
| $CE^2$                                   | 0.003    |                                             |                       |
| $CE^2 / CV^2$                            | 0.026    |                                             |                       |
| $CVB^2$                                  | 0.110    |                                             |                       |
| $CVB^2$ (% of $CV^2$ )                   | 97.38%   |                                             |                       |
| <b>HDSD / 18M / Enriched Environment</b> |          |                                             |                       |
| <b>Subjects</b>                          | <b>N</b> | <b>Thickness (<math>\mu\text{m}</math>)</b> | <b>CE (Scheaffer)</b> |
| HDSD 18M EE Animal 1                     | 10088.97 | $23.23 \pm 0.17$                            | 0.04                  |
| HDSD 18M EE Animal 2                     | 10327.10 | $23.01 \pm 0.78$                            | 0.05                  |
| HDSD 18M EE Animal 3                     | 6681.43  | $16.9 \pm 0.35$                             | 0.06                  |
| HDSD 18M EE Animal 4                     | 10075.85 | $22.75 \pm 0.13$                            | 0.05                  |
| HDSD 18M EE Animal 5                     | 5662.37  | $15.29 \pm 0.54$                            | 0.05                  |
| Mean                                     | 8567.14  | $20.24 \pm 0.39$                            | 0.05                  |
| Standard Error                           | 992.05   | $1.71 \pm 0.12$                             |                       |
| $CV^2$                                   | 0.067    |                                             |                       |
| $CE^2$                                   | 0.003    |                                             |                       |
| $CE^2 / CV^2$                            | 0.038    |                                             |                       |

|                                            |          |                       |                       |
|--------------------------------------------|----------|-----------------------|-----------------------|
| CVB <sup>2</sup>                           | 0.064    |                       |                       |
| CVB <sup>2</sup> (% of CV <sup>2</sup> )   | 96.15%   |                       |                       |
| <b>HDSDHD / 18M / Enriched Environment</b> |          |                       |                       |
| <b>Subjects</b>                            | <b>N</b> | <b>Thickness (μm)</b> | <b>CE (Scheaffer)</b> |
| HDSDHD 18M EE Animal 1                     | 10841.92 | 22.89 ± 0.27          | 0.04                  |
| HDSDHD 18M EE Animal 2                     | 8676.16  | 21.61 ± 0.42          | 0.05                  |
| HDSDHD 18M EE Animal 3                     | 9768.88  | 17.87 ± 0.87          | 0.05                  |
| HDSDHD 18M EE Animal 4                     | 14854.96 | 22.7 ± 0.05           | 0.05                  |
| HDSDHD 18M EE Animal 5                     | 7962.72  | 22.84 ± 0.7           | 0.06                  |
| Mean                                       | 10420.93 | 21.58 ± 0.46          | 0.05                  |
| Standard Error                             | 1211.40  | 0.96 ± 0.15           |                       |
| CV <sup>2</sup>                            | 0.068    |                       |                       |
| CE <sup>2</sup>                            | 0.002    |                       |                       |
| CE <sup>2</sup> / CV <sup>2</sup>          | 0.033    |                       |                       |
| CVB <sup>2</sup>                           | 0.065    |                       |                       |
| CVB <sup>2</sup> (% of CV <sup>2</sup> )   | 96.70%   |                       |                       |
|                                            |          |                       |                       |

CVB<sup>2</sup>= CV<sup>2</sup> – CE<sup>2</sup> (CV, coefficient of variation; CVB, biological coefficient of variation; CE, coefficient of error). N = number of astrocytes; Mean = mean numbers in each group; 6M and 18M indicate 6 months old and 18 months old, respectively.

Table S5. Estimated Unilateral Numbers of Astrocytes (N) With the Coefficient of Error (CE) for the Stratum Radiatum of CA3 of 6-, and 18-Month-Old Female

Albino Swiss Mice Fed a Hard Diet (HD), Hard/Soft Diet (HD/SD) and Hard/Soft/Hard Diet (HDSHD).

| <b><u>STRATUM RADIATUM – CA3</u></b>         |          |                       |                       |
|----------------------------------------------|----------|-----------------------|-----------------------|
| <b>HD / 6M / Impoverished Environment</b>    |          |                       |                       |
| <b>Subjects</b>                              | <b>N</b> | <b>Thickness (μm)</b> | <b>CE (Scheaffer)</b> |
| HD 6M IE Animal 1                            | 14593.03 | 30.18 ± 1.09          | 0.04                  |
| HD 6M IE Animal 2                            | 8010.94  | 24.11 ± 0.48          | 0.05                  |
| HD 6M IE Animal 3                            | 16166.66 | 30.41 ± 1.07          | 0.04                  |
| HD 6M IE Animal 4                            | 15122.66 | 33.65 ± 1.24          | 0.04                  |
| HD 6M IE Animal 5                            | 9498.77  | 25.75 ± 0.69          | 0.05                  |
| Mean                                         | 12678.41 | 28.82 ± 0.92          | 0.04                  |
| Standard Error                               | 1638.65  | 1.72 ± 0.14           |                       |
| CV <sup>2</sup>                              | 0.084    |                       |                       |
| CE <sup>2</sup>                              | 0.002    |                       |                       |
| CE <sup>2</sup> / CV <sup>2</sup>            | 0.020    |                       |                       |
| CVB <sup>2</sup>                             | 0.082    |                       |                       |
| CVB <sup>2</sup> (% of CV <sup>2</sup> )     | 97.98%   |                       |                       |
| <b>HDSHD / 6M / Impoverished Environment</b> |          |                       |                       |
| <b>Subjects</b>                              | <b>N</b> | <b>Thickness (μm)</b> | <b>CE (Scheaffer)</b> |
| HDSHD 6M IE Animal 1                         | 11499.17 | 25.43 ± 0.89          | 0.04                  |
| HDSHD 6M IE Animal 2                         | 9963.00  | 25.18 ± 2             | 0.05                  |
| HDSHD 6M IE Animal 3                         | 13290.43 | 26.17 ± 0.45          | 0.04                  |
| HDSHD 6M IE Animal 4                         | 12658.97 | 21.61 ± 1.66          | 0.04                  |
| HDSHD 6M IE Animal 5                         | 13831.29 | 26.24 ± 0.39          | 0.04                  |



|                                               |          |                       |                       |
|-----------------------------------------------|----------|-----------------------|-----------------------|
| Mean                                          | 12248.57 | 24.93 ± 1.08          | 0.04                  |
| Standard Error                                | 690.81   | 0.85 ± 0.32           |                       |
| CV <sup>2</sup>                               | 0.016    |                       |                       |
| CE <sup>2</sup>                               | 0.002    |                       |                       |
| CE <sup>2</sup> / CV <sup>2</sup>             | 0.110    |                       |                       |
| CVB <sup>2</sup>                              | 0.014    |                       |                       |
| CVB <sup>2</sup> (% of CV <sup>2</sup> )      | 89.01%   |                       |                       |
| <b>HDSDHD / 6M / Impoverished Environment</b> |          |                       |                       |
| <b>Subjects</b>                               | <b>N</b> | <b>Thickness (μm)</b> | <b>CE (Scheaffer)</b> |
| HDSDHD 6M IE Animal 1                         | 13521.86 | 25.03 ± 1.64          | 0.03                  |
| HDSDHD 6M IE Animal 2                         | 6048.51  | 25.96 ± 0.37          | 0.05                  |
| HDSDHD 6M IE Animal 3                         | 13428.26 | 21.03 ± 0.42          | 0.03                  |
| HDSDHD 6M IE Animal 4                         | 10104.51 | 25.02 ± 0.96          | 0.04                  |
| HDSDHD 6M IE Animal 5                         | 15075.00 | 20.16 ± 0.92          | 0.03                  |
| Mean                                          | 11635.63 | 23.44 ± 0.86          | 0.04                  |
| Standard Error                                | 1614.94  | 1.18 ± 0.23           |                       |
| CV <sup>2</sup>                               | 0.096    |                       |                       |
| CE <sup>2</sup>                               | 0.001    |                       |                       |
| CE <sup>2</sup> / CV <sup>2</sup>             | 0.015    |                       |                       |
| CVB <sup>2</sup>                              | 0.095    |                       |                       |
| CVB <sup>2</sup> (% of CV <sup>2</sup> )      | 98.55%   |                       |                       |
| <b>HD / 18M / Impoverished Environment</b>    |          |                       |                       |
| <b>Subjects</b>                               | <b>N</b> | <b>Thickness (μm)</b> | <b>CE (Scheaffer)</b> |
| HD 18M IE Animal 1                            | 18671.91 | 24.5 ± 0.57           | 0.04                  |
| HD 18M IE Animal 2                            | 9399.77  | 26.28 ± 0.26          | 0.04                  |
| HD 18M IE Animal 3                            | 11780.57 | 24.37 ± 1.15          | 0.05                  |
| HD 18M IE Animal 4                            | 17547.00 | 22.75 ± 0.08          | 0.04                  |

|                                                |          |                       |                       |
|------------------------------------------------|----------|-----------------------|-----------------------|
| HD 18M IE Animal 5                             | 16538.40 | 22.28 ± 0.9           | 0.04                  |
| Mean                                           | 14787.53 | 24.04 ± 0.59          | 0.04                  |
| Standard Error                                 | 1786.59  | 0.71 ± 0.2            |                       |
| CV <sup>2</sup>                                | 0.073    |                       |                       |
| CE <sup>2</sup>                                | 0.002    |                       |                       |
| CE <sup>2</sup> / CV <sup>2</sup>              | 0.023    |                       |                       |
| CVB <sup>2</sup>                               | 0.071    |                       |                       |
| CVB <sup>2</sup> (% of CV <sup>2</sup> )       | 97.73%   |                       |                       |
| <b>HDSD / 18M / Impoverished Environment</b>   |          |                       |                       |
| <b>Subjects</b>                                | <b>N</b> | <b>Thickness (μm)</b> | <b>CE (Scheaffer)</b> |
| HDSD 18M IE Animal 1                           | 12113.40 | 20.53 ± 0.77          | 0.04                  |
| HDSD 18M IE Animal 2                           | 17137.89 | 21.98 ± 1.05          | 0.04                  |
| HDSD 18M IE Animal 3                           | 10817.66 | 16.56 ± 0.92          | 0.04                  |
| HDSD 18M IE Animal 4                           | 13453.29 | 22.62 ± 0.09          | 0.04                  |
| HDSD 18M IE Animal 5                           | 32735.40 | 25.96 ± 0.53          | 0.04                  |
| Mean                                           | 17251.53 | 21.53 ± 0.67          | 0.04                  |
| Standard Error                                 | 4012.39  | 1.53 ± 0.17           |                       |
| CV <sup>2</sup>                                | 0.270    |                       |                       |
| CE <sup>2</sup>                                | 0.001    |                       |                       |
| CE <sup>2</sup> / CV <sup>2</sup>              | 0.006    |                       |                       |
| CVB <sup>2</sup>                               | 0.269    |                       |                       |
| CVB <sup>2</sup> (% of CV <sup>2</sup> )       | 99.45%   |                       |                       |
| <b>HDSDHD / 18M / Impoverished Environment</b> |          |                       |                       |
| <b>Subjects</b>                                | <b>N</b> | <b>Thickness (μm)</b> | <b>CE (Scheaffer)</b> |
| HDSDHD 18M IE Animal 1                         | 22165.11 | 26.86 ± 0.78          | 0.04                  |
| HDSDHD 18M IE Animal 2                         | 12348.77 | 23.89 ± 0.6           | 0.04                  |
| HDSDHD 18M IE Animal 3                         | 8292.94  | 13.68 ± 0.44          | 0.04                  |
| HDSDHD 18M IE Animal 4                         | 9421.71  | 22.9 ± 0.16           | 0.05                  |

|                                          |          |                       |                       |
|------------------------------------------|----------|-----------------------|-----------------------|
| HDSDHD 18M IE Animal 5                   | 9375.77  | 20.56 ± 1.07          | 0.05                  |
| Mean                                     | 12320.86 | 21.58 ± 0.61          | 0.04                  |
| Standard Error                           | 2551.60  | 2.22 ± 0.15           |                       |
| CV <sup>2</sup>                          | 0.214    |                       |                       |
| CE <sup>2</sup>                          | 0.002    |                       |                       |
| CE <sup>2</sup> / CV <sup>2</sup>        | 0.008    |                       |                       |
| CVB <sup>2</sup>                         | 0.213    |                       |                       |
| CVB <sup>2</sup> (% of CV <sup>2</sup> ) | 99.17%   |                       |                       |
| <b>HD / 6M / Enriched Environment</b>    |          |                       |                       |
| <b>Subjects</b>                          | <b>N</b> | <b>Thickness (μm)</b> | <b>CE (Scheaffer)</b> |
| HD 6M EE Animal 1                        | 13491.26 | 20.53 ± 0.62          | 0.04                  |
| HD 6M EE Animal 2                        | 10096.54 | 21.95 ± 0.39          | 0.04                  |
| HD 6M EE Animal 3                        | 4886.57  | 21.71 ± 0.9           | 0.06                  |
| HD 6M EE Animal 4                        | 10923.34 | 18.53 ± 0.81          | 0.04                  |
| HD 6M EE Animal 5                        | 11980.89 | 20.24 ± 0.74          | 0.04                  |
| Mean                                     | 10275.72 | 20.59 ± 0.69          | 0.04                  |
| Standard Error                           | 1461.88  | 0.61 ± 0.09           |                       |
| CV <sup>2</sup>                          | 4.316    |                       |                       |
| CE <sup>2</sup>                          | 0.002    |                       |                       |
| CE <sup>2</sup> / CV <sup>2</sup>        | 0.000    |                       |                       |
| CVB <sup>2</sup>                         | 4.315    |                       |                       |
| CVB <sup>2</sup> (% of CV <sup>2</sup> ) | 99.96%   |                       |                       |
| <b>HDSD / 6M / Enriched Environment</b>  |          |                       |                       |
| <b>Subjects</b>                          | <b>N</b> | <b>Thickness (μm)</b> | <b>CE (Scheaffer)</b> |
| HDSD 6M EE Animal 1                      | 4758.94  | 22.28 ± 0.33          | 0.06                  |
| HDSD 6M EE Animal 2                      | 9632.91  | 17.83 ± 1.5           | 0.04                  |
| HDSD 6M EE Animal 3                      | 8757.34  | 22.07 ± 0.34          | 0.05                  |
| HDSD 6M EE Animal 4                      | 6431.83  | 19 ± 0.97             | 0.06                  |
| Mean                                     | 7395.26  | 20.3 ± 0.78           | 0.05                  |

|                                           |          |                       |                       |
|-------------------------------------------|----------|-----------------------|-----------------------|
| Standard Error                            | 1108.33  | 1.11 ± 0.28           |                       |
| CV <sup>2</sup>                           | 0.0898   |                       |                       |
| CE <sup>2</sup>                           | 0.003    |                       |                       |
| CE <sup>2</sup> / CV <sup>2</sup>         | 0.032    |                       |                       |
| CVB <sup>2</sup>                          | 0.087    |                       |                       |
| CVB <sup>2</sup> (% of CV <sup>2</sup> )  | 96.85%   |                       |                       |
| <b>HDSDHD / 6M / Enriched Environment</b> |          |                       |                       |
| <b>Subjects</b>                           | <b>N</b> | <b>Thickness (μm)</b> | <b>CE (Scheaffer)</b> |
| HDSDHD 6M EE Animal 1                     | 12212.23 | 22.63 ± 0.49          | 0.04                  |
| HDSDHD 6M EE Animal 2                     | 7551.60  | 18.99 ± 1.08          | 0.05                  |
| HDSDHD 6M EE Animal 3                     | 10336.80 | 18.69 ± 0.87          | 0.05                  |
| HDSDHD 6M EE Animal 4                     | 11319.00 | 22.67 ± 0.06          | 0.04                  |
| HDSDHD 6M EE Animal 5                     | 7357.54  | 22.27 ± 0.97          | 0.06                  |
| Mean                                      | 9755.43  | 21.05 ± 0.69          | 0.05                  |
| Standard Error                            | 985.53   | 0.91 ± 0.19           |                       |
| CV <sup>2</sup>                           | 0.051    |                       |                       |
| CE <sup>2</sup>                           | 0.002    |                       |                       |
| CE <sup>2</sup> / CV <sup>2</sup>         | 0.043    |                       |                       |
| CVB <sup>2</sup>                          | 0.049    |                       |                       |
| CVB <sup>2</sup> (% of CV <sup>2</sup> )  | 95.69%   |                       |                       |
| <b>HD / 18M / Enriched Environment</b>    |          |                       |                       |
| <b>Subjects</b>                           | <b>N</b> | <b>Thickness (μm)</b> | <b>CE (Scheaffer)</b> |
| HD 18M EE Animal 1                        | 10575.26 | 23.65 ± 0.24          | 0.04                  |
| HD 18M EE Animal 2                        | 12901.03 | 21.89 ± 0.28          | 0.04                  |
| HD 18M EE Animal 3                        | 12434.57 | 19.99 ± 0.94          | 0.05                  |
| HD 18M EE Animal 4                        | 12488.23 | 22.59 ± 0.11          | 0.04                  |

|                                            |          |                       |                       |
|--------------------------------------------|----------|-----------------------|-----------------------|
| HD 18M EE Animal 5                         | 7176.60  | 18.69 ± 0.53          | 0.05                  |
| Mean                                       | 11115.14 | 21.36 ± 0.42          | 0.04                  |
| Standard Error                             | 1063.47  | 0.9 ± 0.15            |                       |
| CV <sup>2</sup>                            | 0.046    |                       |                       |
| CE <sup>2</sup>                            | 0.002    |                       |                       |
| CE <sup>2</sup> / CV <sup>2</sup>          | 0.043    |                       |                       |
| CVB <sup>2</sup>                           | 0.044    |                       |                       |
| CVB <sup>2</sup> (% of CV <sup>2</sup> )   | 95.73%   |                       |                       |
| <b>HDSD / 18M / Enriched Environment</b>   |          |                       |                       |
| <b>Subjects</b>                            | <b>N</b> | <b>Thickness (μm)</b> | <b>CE (Scheaffer)</b> |
| HDSD 18M EE Animal 1                       | 12905.06 | 22.81 ± 0.23          | 0.04                  |
| HDSD 18M EE Animal 2                       | 14964.86 | 23.42 ± 0.83          | 0.04                  |
| HDSD 18M EE Animal 3                       | 13116.26 | 18.25 ± 0.76          | 0.04                  |
| HDSD 18M EE Animal 4                       | 9376.37  | 22.81 ± 0.05          | 0.05                  |
| HDSD 18M EE Animal 5                       | 6234.60  | 15.41 ± 0.36          | 0.05                  |
| Mean                                       | 11319.43 | 20.54 ± 0.45          | 0.04                  |
| Standard Error                             | 1559.85  | 1.58 ± 0.15           |                       |
| CV <sup>2</sup>                            | 0.095    |                       |                       |
| CE <sup>2</sup>                            | 0.002    |                       |                       |
| CE <sup>2</sup> / CV <sup>2</sup>          | 0.020    |                       |                       |
| CVB <sup>2</sup>                           | 0.093    |                       |                       |
| CVB <sup>2</sup> (% of CV <sup>2</sup> )   | 98.03%   |                       |                       |
| <b>HDSDHD / 18M / Enriched Environment</b> |          |                       |                       |
| <b>Subjects</b>                            | <b>N</b> | <b>Thickness (μm)</b> | <b>CE (Scheaffer)</b> |
| HDSDHD 18M EE Animal 1                     | 10925.74 | 23.44 ± 0.31          | 0.04                  |
| HDSDHD 18M EE Animal 2                     | 13150.89 | 21.7 ± 0.4            | 0.04                  |
| HDSDHD 18M EE Animal 3                     | 11238.00 | 17.67 ± 0.59          | 0.04                  |

|                                          |          |              |      |
|------------------------------------------|----------|--------------|------|
| HDSDHD 18M EE Animal 4                   | 17173.20 | 22.79 ± 0.04 | 0.05 |
| HDSDHD 18M EE Animal 5                   | 10076.66 | 22.17 ± 0.57 | 0.04 |
| Mean                                     | 12512.90 | 21.55 ± 0.38 | 0.04 |
| Standard Error                           | 1268.96  | 1.01 ± 0.1   |      |
| CV <sup>2</sup>                          | 0.051    |              |      |
| CE <sup>2</sup>                          | 0.002    |              |      |
| CE <sup>2</sup> / CV <sup>2</sup>        | 0.035    |              |      |
| CVB <sup>2</sup>                         | 0.050    |              |      |
| CVB <sup>2</sup> (% of CV <sup>2</sup> ) | 96.52%   |              |      |

CVB<sup>2</sup>= CV<sup>2</sup> – CE<sup>2</sup> (CV, coefficient of variation; CVB, biological coefficient of variation; CE, coefficient of error). N = number of astrocytes; Mean = mean numbers in each group; 6M and 18M indicate 6 months old and 18 months old, respectively.

Table S6. Estimated Unilateral Numbers of Astrocytes (N) With the Coefficient of Error (CE) for the Stratum Oriens of CA3 of 6-, and 18-Month-Old Female Albino Swiss Mice Fed a Hard Diet (HD), Hard/Soft Diet (HD/SD) and Hard/Soft/Hard Diet (HDSDHD).

| <u>STRATUM ORIENS – CA3</u>        |          |                |                |
|------------------------------------|----------|----------------|----------------|
| HD / 6M / Impoverished Environment |          |                |                |
| Subjects                           | N        | Thickness (µm) | CE (Scheaffer) |
| HD 6M IE Animal 1                  | 16145.74 | 28.73 ± 0.85   | 0.04           |

|                                               |          |                       |                       |
|-----------------------------------------------|----------|-----------------------|-----------------------|
| HD 6M IE Animal 2                             | 12813.51 | 24.94 ± 0.71          | 0.04                  |
| HD 6M IE Animal 3                             | 31023.94 | 32.16 ± 0.76          | 0.03                  |
| HD 6M IE Animal 4                             | 22152.94 | 33.81 ± 1.32          | 0.03                  |
| HD 6M IE Animal 5                             | 13489.89 | 26.26 ± 0.55          | 0.04                  |
| Mean                                          | 19125.21 | 29.18 ± 0.84          | 0.04                  |
| Standard Error                                | 3400.14  | 1.69 ± 0.13           |                       |
| CV <sup>2</sup>                               | 0.158    |                       |                       |
| CE <sup>2</sup>                               | 0.001    |                       |                       |
| CE <sup>2</sup> / CV <sup>2</sup>             | 0.009    |                       |                       |
| CVB <sup>2</sup>                              | 0.157    |                       |                       |
| CVB <sup>2</sup> (% of CV <sup>2</sup> )      | 99.12%   |                       |                       |
| <b>HDSD / 6M / Impoverished Environment</b>   |          |                       |                       |
| <b>Subjects</b>                               | <b>N</b> | <b>Thickness (μm)</b> | <b>CE (Scheaffer)</b> |
| HDSD 6M IE Animal 1                           | 13479.26 | 25.87 ± 0.79          | 0.04                  |
| HDSD 6M IE Animal 2                           | 8900.06  | 27.1 ± 3.01           | 0.05                  |
| HDSD 6M IE Animal 3                           | 14658.94 | 26.24 ± 0.38          | 0.04                  |
| HDSD 6M IE Animal 4                           | 16866.09 | 23.29 ± 1.12          | 0.04                  |
| HDSD 6M IE Animal 5                           | 15481.71 | 27.21 ± 0.39          | 0.04                  |
| Mean                                          | 13877.21 | 25.94 ± 1.14          | 0.04                  |
| Standard Error                                | 1361.05  | 0.71 ± 0.49           |                       |
| CV <sup>2</sup>                               | 0.048    |                       |                       |
| CE <sup>2</sup>                               | 0.002    |                       |                       |
| CE <sup>2</sup> / CV <sup>2</sup>             | 0.037    |                       |                       |
| CVB <sup>2</sup>                              | 0.046    |                       |                       |
| CVB <sup>2</sup> (% of CV <sup>2</sup> )      | 96.35%   |                       |                       |
| <b>HDSDHD / 6M / Impoverished Environment</b> |          |                       |                       |
| <b>Subjects</b>                               | <b>N</b> | <b>Thickness (μm)</b> | <b>CE (Scheaffer)</b> |

|                                              |          |                       |                       |
|----------------------------------------------|----------|-----------------------|-----------------------|
| HDSDHD 6M IE Animal 1                        | 18115.71 | 26.15 ± 1.2           | 0.03                  |
| HDSDHD 6M IE Animal 2                        | 14394.94 | 26.19 ± 0.48          | 0.04                  |
| HDSDHD 6M IE Animal 3                        | 15123.86 | 22.31 ± 0.62          | 0.04                  |
| HDSDHD 6M IE Animal 4                        | 16029.86 | 25.38 ± 0.9           | 0.04                  |
| HDSDHD 6M IE Animal 5                        | 15274.89 | 22.11 ± 1.41          | 0.03                  |
| Mean                                         | 15787.85 | 24.43 ± 0.92          | 0.04                  |
| Standard Error                               | 637.25   | 0.92 ± 0.17           |                       |
| CV <sup>2</sup>                              | 0.008    |                       |                       |
| CE <sup>2</sup>                              | 0.001    |                       |                       |
| CE <sup>2</sup> / CV <sup>2</sup>            | 0.159    |                       |                       |
| CVB <sup>2</sup>                             | 0.007    |                       |                       |
| CVB <sup>2</sup> (% of CV <sup>2</sup> )     | 84.09%   |                       |                       |
| <b>HD / 18M / Impoverished Environment</b>   |          |                       |                       |
| <b>Subjects</b>                              | <b>N</b> | <b>Thickness (μm)</b> | <b>CE (Scheaffer)</b> |
| HD 18M IE Animal 1                           | 14229.08 | 25.2 ± 0.91           | 0.04                  |
| HD 18M IE Animal 2                           | 11626.37 | 26.49 ± 0.16          | 0.04                  |
| HD 18M IE Animal 3                           | 14641.39 | 25.97 ± 0.76          | 0.04                  |
| HD 18M IE Animal 4                           | 19573.46 | 22.76 ± 0.13          | 0.04                  |
| HD 18M IE Animal 5                           | 16992.17 | 24.13 ± 0.96          | 0.04                  |
| Mean                                         | 15412.49 | 24.91 ± 0.58          | 0.04                  |
| Standard Error                               | 1344.22  | 0.67 ± 0.18           |                       |
| CV <sup>2</sup>                              | 0.038    |                       |                       |
| CE <sup>2</sup>                              | 0.002    |                       |                       |
| CE <sup>2</sup> / CV <sup>2</sup>            | 0.044    |                       |                       |
| CVB <sup>2</sup>                             | 0.036    |                       |                       |
| CVB <sup>2</sup> (% of CV <sup>2</sup> )     | 95.56%   |                       |                       |
| <b>HDSD / 18M / Impoverished Environment</b> |          |                       |                       |
| <b>Subjects</b>                              | <b>N</b> | <b>Thickness (μm)</b> | <b>CE (Scheaffer)</b> |



|                                                |          |                       |                       |
|------------------------------------------------|----------|-----------------------|-----------------------|
| HDSD 18M IE Animal 1                           | 17410.02 | 21.72 ± 0.89          | 0.04                  |
| HDSD 18M IE Animal 2                           | 18946.89 | 23.37 ± 1.33          | 0.04                  |
| HDSD 18M IE Animal 3                           | 15305.14 | 19.01 ± 0.45          | 0.04                  |
| HDSD 18M IE Animal 4                           | 16827.09 | 22.66 ± 0.13          | 0.04                  |
| HDSD 18M IE Animal 5                           | 35493.86 | 28.62 ± 0.61          | 0.03                  |
| Mean                                           | 20796.60 | 23.08 ± 0.68          | 0.04                  |
| Standard Error                                 | 3720.30  | 1.57 ± 0.2            |                       |
| CV <sup>2</sup>                                | 0.160    |                       |                       |
| CE <sup>2</sup>                                | 0.001    |                       |                       |
| CE <sup>2</sup> / CV <sup>2</sup>              | 0.009    |                       |                       |
| CVB <sup>2</sup>                               | 0.159    |                       |                       |
| CVB <sup>2</sup> (% of CV <sup>2</sup> )       | 99.11%   |                       |                       |
| <b>HDSDHD / 18M / Impoverished Environment</b> |          |                       |                       |
| <b>Subjects</b>                                | <b>N</b> | <b>Thickness (μm)</b> | <b>CE (Scheaffer)</b> |
| HDSDHD 18M IE Animal 1                         | 23555.91 | 28.05 ± 0.75          | 0.04                  |
| HDSDHD 18M IE Animal 2                         | 14862.29 | 26.03 ± 0.57          | 0.03                  |
| HDSDHD 18M IE Animal 3                         | 12602.23 | 15.89 ± 0.76          | 0.04                  |
| HDSDHD 18M IE Animal 4                         | 11479.71 | 22.84 ± 0.15          | 0.05                  |
| HDSDHD 18M IE Animal 5                         | 12617.91 | 24.17 ± 1.65          | 0.05                  |
| Mean                                           | 15023.61 | 23.4 ± 0.77           | 0.04                  |
| Standard Error                                 | 2202.68  | 2.07 ± 0.24           |                       |
| CV <sup>2</sup>                                | 0.107    |                       |                       |
| CE <sup>2</sup>                                | 0.002    |                       |                       |
| CE <sup>2</sup> / CV <sup>2</sup>              | 0.016    |                       |                       |
| CVB <sup>2</sup>                               | 0.106    |                       |                       |
| CVB <sup>2</sup> (% of CV <sup>2</sup> )       | 98.44%   |                       |                       |
| <b>HD / 6M / Enriched Environment</b>          |          |                       |                       |

| Subjects                                  | N        | Thickness ( $\mu\text{m}$ ) | CE (Scheaffer) |
|-------------------------------------------|----------|-----------------------------|----------------|
| HD 6M EE Animal 1                         | 15015.77 | 21.39 $\pm$ 0.75            | 0.04           |
| HD 6M EE Animal 2                         | 8134.37  | 22.07 $\pm$ 0.22            | 0.05           |
| HD 6M EE Animal 3                         | 8214.43  | 22.02 $\pm$ 0.87            | 0.04           |
| HD 6M EE Animal 4                         | 13109.49 | 20.03 $\pm$ 0.35            | 0.04           |
| HD 6M EE Animal 5                         | 14859.00 | 23.35 $\pm$ 1.01            | 0.04           |
| Mean                                      | 11866.61 | 21.77 $\pm$ 0.64            | 0.04           |
| Standard Error                            | 1544.09  | 0.54 $\pm$ 0.15             |                |
| CV <sup>2</sup>                           | 0.085    |                             |                |
| CE <sup>2</sup>                           | 0.002    |                             |                |
| CE <sup>2</sup> / CV <sup>2</sup>         | 0.022    |                             |                |
| CVB <sup>2</sup>                          | 0.083    |                             |                |
| CVB <sup>2</sup> (% of CV <sup>2</sup> )  | 97.84%   |                             |                |
| <b>HDSD / 6M / Enriched Environment</b>   |          |                             |                |
| Subjects                                  | N        | Thickness ( $\mu\text{m}$ ) | CE (Scheaffer) |
| HDSD 6M EE Animal 1                       | 11086.46 | 24.16 $\pm$ 0.19            | 0.04           |
| HDSD 6M EE Animal 2                       | 12603.34 | 18.87 $\pm$ 1.38            | 0.04           |
| HDSD 6M EE Animal 3                       | 12684.00 | 21.83 $\pm$ 0.3             | 0.05           |
| HDSD 6M EE Animal 4                       | 8575.20  | 24.15 $\pm$ 0.78            | 0.05           |
| Mean                                      | 11237.25 | 22.25 $\pm$ 0.66            | 0.05           |
| Standard Error                            | 960.41   | 1.25 $\pm$ 0.27             |                |
| CV <sup>2</sup>                           | 0.0292   |                             |                |
| CE <sup>2</sup>                           | 0.002    |                             |                |
| CE <sup>2</sup> / CV <sup>2</sup>         | 0.073    |                             |                |
| CVB <sup>2</sup>                          | 0.027    |                             |                |
| CVB <sup>2</sup> (% of CV <sup>2</sup> )  | 92.66%   |                             |                |
| <b>HDSDHD / 6M / Enriched Environment</b> |          |                             |                |

| Subjects                                 | N        | Thickness (μm) | CE (Scheaffer) |
|------------------------------------------|----------|----------------|----------------|
| HDSDHD 6M EE Animal 1                    | 15315.94 | 23.76 ± 0.59   | 0.04           |
| HDSDHD 6M EE Animal 2                    | 15102.69 | 20.54 ± 0.38   | 0.04           |
| HDSDHD 6M EE Animal 3                    | 12304.89 | 19.86 ± 1.11   | 0.05           |
| HDSDHD 6M EE Animal 4                    | 12158.23 | 22.67 ± 0.04   | 0.05           |
| HDSDHD 6M EE Animal 5                    | 11663.14 | 25.69 ± 0.47   | 0.05           |
| Mean                                     | 13308.98 | 22.5 ± 0.52    | 0.04           |
| Standard Error                           | 783.79   | 1.06 ± 0.17    |                |
| CV <sup>2</sup>                          | 0.017    |                |                |
| CE <sup>2</sup>                          | 0.002    |                |                |
| CE <sup>2</sup> / CV <sup>2</sup>        | 0.116    |                |                |
| CVB <sup>2</sup>                         | 0.015    |                |                |
| CVB <sup>2</sup> (% of CV <sup>2</sup> ) | 88.43%   |                |                |
| HD / 18M / Enriched Environment          |          |                |                |
| Subjects                                 | N        | Thickness (μm) | CE (Scheaffer) |
| HD 18M EE Animal 1                       | 10575.26 | 23.65 ± 0.24   | 0.04           |
| HD 18M EE Animal 2                       | 12901.03 | 21.89 ± 0.28   | 0.04           |
| HD 18M EE Animal 3                       | 12434.57 | 19.99 ± 0.94   | 0.05           |
| HD 18M EE Animal 4                       | 12488.23 | 22.59 ± 0.11   | 0.04           |
| HD 18M EE Animal 5                       | 7176.60  | 18.69 ± 0.53   | 0.05           |
| Mean                                     | 11115.14 | 21.36 ± 0.42   | 0.04           |
| Standard Error                           | 1063.47  | 0.9 ± 0.15     |                |
| CV <sup>2</sup>                          | 0.046    |                |                |
| CE <sup>2</sup>                          | 0.002    |                |                |
| CE <sup>2</sup> / CV <sup>2</sup>        | 0.043    |                |                |
| CVB <sup>2</sup>                         | 0.044    |                |                |
| CVB <sup>2</sup> (% of CV <sup>2</sup> ) | 95.73%   |                |                |

| HDSD / 18M / Enriched Environment        |          |                |                |
|------------------------------------------|----------|----------------|----------------|
| Subjects                                 | N        | Thickness (μm) | CE (Scheaffer) |
| HDSD 18M EE Animal 1                     | 8565.51  | 23.69 ± 0.12   | 0.05           |
| HDSD 18M EE Animal 2                     | 18323.40 | 23.85 ± 0.3    | 0.04           |
| HDSD 18M EE Animal 3                     | 13679.49 | 20.95 ± 1.04   | 0.05           |
| HDSD 18M EE Animal 4                     | 10696.80 | 22.57 ± 0.1    | 0.05           |
| HDSD 18M EE Animal 5                     | 9811.89  | 23.94 ± 1.55   | 0.05           |
| Mean                                     | 12215.42 | 23 ± 0.62      | 0.05           |
| Standard Error                           | 1744.36  | 0.57 ± 0.29    |                |
| CV <sup>2</sup>                          | 0.102    |                |                |
| CE <sup>2</sup>                          | 0.002    |                |                |
| CE <sup>2</sup> / CV <sup>2</sup>        | 0.020    |                |                |
| CVB <sup>2</sup>                         | 0.100    |                |                |
| CVB <sup>2</sup> (% of CV <sup>2</sup> ) | 97.96%   |                |                |
| HDSDHD / 18M / Enriched Environment      |          |                |                |
| Subjects                                 | N        | Thickness (μm) | CE (Scheaffer) |
| HDSDHD 18M EE Animal 1                   | 17229.69 | 22.83 ± 0.19   | 0.04           |
| HDSDHD 18M EE Animal 2                   | 16386.00 | 24.73 ± 0.69   | 0.04           |
| HDSDHD 18M EE Animal 3                   | 13125.94 | 19.08 ± 0.47   | 0.04           |
| HDSDHD 18M EE Animal 4                   | 11479.46 | 22.71 ± 0.13   | 0.05           |
| HDSDHD 18M EE Animal 5                   | 9487.29  | 20.66 ± 0.8    | 0.04           |
| Mean                                     | 13541.67 | 22 ± 0.45      | 0.04           |
| Standard Error                           | 1458.69  | 0.97 ± 0.13    |                |
| CV <sup>2</sup>                          | 0.058    |                |                |
| CE <sup>2</sup>                          | 0.002    |                |                |
| CE <sup>2</sup> / CV <sup>2</sup>        | 0.031    |                |                |
| CVB <sup>2</sup>                         | 0.056    |                |                |
| CVB <sup>2</sup> (% of CV <sup>2</sup> ) | 96.94%   |                |                |

$CVB^2 = CV^2 - CE^2$  (CV, coefficient of variation; CVB, biological coefficient of variation; CE, coefficient of error). N = number of astrocytes; Mean = mean numbers in each group; 6M and 18M indicate 6 months old and 18 months old, respectively.

Table S7. Estimated Unilateral Numbers of Astrocytes (N) With the Coefficient of Error (CE) for the Stratum Moleculare of Dentate Gyrus of 6-, and 18-Month-Old Female Albino Swiss Mice Fed a Hard Diet (HD), Hard/Soft Diet (HD/SD) and Hard/Soft/Hard Diet (HD/SD/HD).

| <b>STRATUM MOLECULARE – DENTATE GYRUS</b>   |          |                       |                       |
|---------------------------------------------|----------|-----------------------|-----------------------|
| <b>HD / 6M / Impoverished Environment</b>   |          |                       |                       |
| <b>Subjects</b>                             | <b>N</b> | <b>Thickness (μm)</b> | <b>CE (Scheaffer)</b> |
| HD 6M IE Animal 1                           | 32762.48 | 26.2 ± 0.13           | 0.03                  |
| HD 6M IE Animal 2                           | 34637.74 | 26.5 ± 0.05           | 0.03                  |
| HD 6M IE Animal 3                           | 24791.74 | 24.8 ± 0.2            | 0.04                  |
| HD 6M IE Animal 4                           | 26607.43 | 26 ± 0.18             | 0.03                  |
| HD 6M IE Animal 5                           | 32381.14 | 25.31 ± 0.16          | 0.03                  |
| Mean                                        | 30236.11 | 25.77 ± 0.15          | 0.03                  |
| Standard Error                              | 1912.67  | 0.31 ± 0.02           |                       |
| CV <sup>2</sup>                             | 0.02     |                       |                       |
| CE <sup>2</sup>                             | 0.001    |                       |                       |
| CE <sup>2</sup> / CV <sup>2</sup>           | 0.05     |                       |                       |
| CVB <sup>2</sup>                            | 0.02     |                       |                       |
| CVB <sup>2</sup> (% of CV <sup>2</sup> )    | 94.93%   |                       |                       |
| <b>HDSD / 6M / Impoverished Environment</b> |          |                       |                       |
| <b>Subjects</b>                             | <b>N</b> | <b>Thickness (μm)</b> | <b>CE (Scheaffer)</b> |
| HDSD 6M IE Animal 1                         | 24271.85 | 25.75 ± 0.81          | 0.04                  |
| HDSD 6M IE Animal 2                         | 29155    | 23.12 ± 0.98          | 0.03                  |
| HDSD 6M IE Animal 3                         | 36534.17 | 25.37 ± 0.28          | 0.03                  |
| HDSD 6M IE Animal 4                         | 28660.03 | 23.52 ± 0.29          | 0.03                  |
| HDSD 6M IE Animal 5                         | 21163    | 22.46 ± 0.5           | 0.03                  |

|                                               |          |                       |                       |
|-----------------------------------------------|----------|-----------------------|-----------------------|
| Mean                                          | 27956.81 | 24.05 ± 0.59          | 0.03                  |
| Standard Error                                | 2600.35  | 0.64 ± 0.16           |                       |
| CV <sup>2</sup>                               | 0.043    |                       |                       |
| CE <sup>2</sup>                               | 0.001    |                       |                       |
| CE <sup>2</sup> / CV <sup>2</sup>             | 0.001    |                       |                       |
| CVB <sup>2</sup>                              | 0.042    |                       |                       |
| CVB <sup>2</sup> (% of CV <sup>2</sup> )      | 97.64%   |                       |                       |
| <b>HDSDHD / 6M / Impoverished Environment</b> |          |                       |                       |
| <b>Subjects</b>                               | <b>N</b> | <b>Thickness (µm)</b> | <b>CE (Scheaffer)</b> |
| HDSDHD 6M IE Animal 1                         | 25457.48 | 24.2 ± 0.18           | 0.03                  |
| HDSDHD 6M IE Animal 2                         | 31548.09 | 25.01 ± 0.14          | 0.03                  |
| HDSDHD 6M IE Animal 3                         | 43042.29 | 24.07 ± 0.39          | 0.03                  |
| HDSDHD 6M IE Animal 4                         | 25881.09 | 22.4 ± 0.4            | 0.03                  |
| HDSDHD 6M IE Animal 5                         | 31381.71 | 22.9 ± 0.49           | 0.03                  |
| Mean                                          | 31462.13 | 23.72 ± 0.32          | 0.03                  |
| Standard Error                                | 3172.68  | 0.47 ± 0.07           |                       |
| CV <sup>2</sup>                               | 0.051    |                       |                       |
| CE <sup>2</sup>                               | 0.001    |                       |                       |
| CE <sup>2</sup> / CV <sup>2</sup>             | 0.016    |                       |                       |
| CVB <sup>2</sup>                              | 0.05     |                       |                       |
| CVB <sup>2</sup> (% of CV <sup>2</sup> )      | 98.36%   |                       |                       |
| <b>HD / 18M / Impoverished Environment</b>    |          |                       |                       |
| <b>Subjects</b>                               | <b>N</b> | <b>Thickness (µm)</b> | <b>CE (Scheaffer)</b> |
| HD 18M IE Animal 1                            | 36240.17 | 25.5 ± 0.21           | 0.03                  |
| HD 18M IE Animal 2                            | 18044.31 | 24.97 ± 0.32          | 0.04                  |
| HD 18M IE Animal 3                            | 22563.94 | 25.18 ± 0.31          | 0.04                  |
| HD 18M IE Animal 4                            | 26491.03 | 25.02 ± 0.75          | 0.03                  |
| HD 18M IE Animal 5                            | 32960.91 | 25.56 ± 0.44          | 0.03                  |
| Mean                                          | 27260.07 | 25.25 ± 0.41          | 0.03                  |
| Standard Error                                | 3322.02  | 0.12 ± 0.09           |                       |
| CV <sup>2</sup>                               | 0.074    |                       |                       |
| CE <sup>2</sup>                               | 0.001    |                       |                       |
| CE <sup>2</sup> / CV <sup>2</sup>             | 0.015    |                       |                       |
| CVB <sup>2</sup>                              | 0.073    |                       |                       |

|                                                |          |                       |                       |
|------------------------------------------------|----------|-----------------------|-----------------------|
| CVB <sup>2</sup> (% of CV <sup>2</sup> )       | 98.51%   |                       |                       |
| <b>HDSD / 18M / Impoverished Environment</b>   |          |                       |                       |
| <b>Subjects</b>                                | <b>N</b> | <b>Thickness (μm)</b> | <b>CE (Scheaffer)</b> |
| HDSD 18M IE Animal 1                           | 24294.69 | 23.69 ± 0.71          | 0.03                  |
| HDSD 18M IE Animal 2                           | 22587.94 | 25.3 ± 0.73           | 0.04                  |
| HDSD 18M IE Animal 3                           | 27544.03 | 24.98 ± 0.5           | 0.03                  |
| HDSD 18M IE Animal 4                           | 10749.43 | 23.87 ± 0.53          | 0.05                  |
| HDSD 18M IE Animal 5                           | 21564.51 | 27.02 ± 0.25          | 0.03                  |
| Mean                                           | 21348.12 | 24.97 ± 0.55          | 0.04                  |
| Standard Error                                 | 2837.14  | 0.6 ± 0.09            |                       |
| CV <sup>2</sup>                                | 0.088    |                       |                       |
| CE <sup>2</sup>                                | 0.001    |                       |                       |
| CE <sup>2</sup> / CV <sup>2</sup>              | 0.016    |                       |                       |
| CVB <sup>2</sup>                               | 0.087    |                       |                       |
| CVB <sup>2</sup> (% of CV <sup>2</sup> )       | 98.41%   |                       |                       |
| <b>HDSDHD / 18M / Impoverished Environment</b> |          |                       |                       |
| <b>Subjects</b>                                | <b>N</b> | <b>Thickness (μm)</b> | <b>CE (Scheaffer)</b> |
| HDSDHD 18M IE Animal 1                         | 18373.89 | 26.05 ± 0.18          | 0.04                  |
| HDSDHD 18M IE Animal 2                         | 22414.29 | 24 ± 0.64             | 0.03                  |
| HDSDHD 18M IE Animal 3                         | 31035.69 | 22.39 ± 0.35          | 0.03                  |
| HDSDHD 18M IE Animal 4                         | 20105.74 | 24.78 ± 0.45          | 0.04                  |
| HDSDHD 18M IE Animal 5                         | 21732.69 | 23.38 ± 1.01          | 0.04                  |
| Mean                                           | 22732.46 | 24.12 ± 0.52          | 0.03                  |
| Standard Error                                 | 2190.22  | 0.62 ± 0.14           |                       |
| CV <sup>2</sup>                                | 0.046    |                       |                       |
| CE <sup>2</sup>                                | 0.001    |                       |                       |
| CE <sup>2</sup> / CV <sup>2</sup>              | 0.026    |                       |                       |
| CVB <sup>2</sup>                               | 0.045    |                       |                       |
| CVB <sup>2</sup> (% of CV <sup>2</sup> )       | 97.42%   |                       |                       |
| <b>HD / 6M / Enriched Environment</b>          |          |                       |                       |
| <b>Subjects</b>                                | <b>N</b> | <b>Thickness (μm)</b> | <b>CE (Scheaffer)</b> |
| HD 6M EE Animal 1                              | 23997    | 24.31 ± 0.4           | 0.03                  |
| HD 6M EE Animal 2                              | 27170.66 | 21.39 ± 0.38          | 0.03                  |
| HD 6M EE Animal 3                              | 20119.8  | 21.64 ± 1.22          | 0.04                  |

|                                           |          |                       |                       |
|-------------------------------------------|----------|-----------------------|-----------------------|
| HD 6M EE Animal 4                         | 31987.46 | 23.1 ± 0.37           | 0.03                  |
| HD 6M EE Animal 5                         | 30681.94 | 24.5 ± 0.32           | 0.03                  |
| Mean                                      | 26791.37 | 22.99 ± 0.54          | 0.03                  |
| Standard Error                            | 2174.83  | 0.65 ± 0.17           |                       |
| CV <sup>2</sup>                           | 0.033    |                       |                       |
| CE <sup>2</sup>                           | 0.001    |                       |                       |
| CE <sup>2</sup> / CV <sup>2</sup>         | 0.032    |                       |                       |
| CVB <sup>2</sup>                          | 0.032    |                       |                       |
| CVB <sup>2</sup> (% of CV <sup>2</sup> )  | 96.79%   |                       |                       |
| <b>HDSD / 6M / Enriched Environment</b>   |          |                       |                       |
| <b>Subjects</b>                           | <b>N</b> | <b>Thickness (μm)</b> | <b>CE (Scheaffer)</b> |
| HDSD 6M EE Animal 1                       | 14059.71 | 19.14 ± 0.84          | 0.04                  |
| HDSD 6M EE Animal 2                       | 22781.31 | 20.27 ± 0.67          | 0.04                  |
| HDSD 6M EE Animal 3                       | 56766.26 | 20.53 ± 0.33          | 0.02                  |
| HDSD 6M EE Animal 4                       | 36989.57 | 19.64 ± 0.37          | 0.03                  |
| HDSD 6M EE Animal 5                       | 24346.11 | 20.55 ± 0.73          | 0.03                  |
| Mean                                      | 30988.59 | 20.03 ± 0.59          | 0.03                  |
| Standard Error                            | 7411.37  | 0.28 ± 0.1            |                       |
| CV <sup>2</sup>                           | 0.286    |                       |                       |
| CE <sup>2</sup>                           | 0.001    |                       |                       |
| CE <sup>2</sup> / CV <sup>2</sup>         | 0.004    |                       |                       |
| CVB <sup>2</sup>                          | 0.285    |                       |                       |
| CVB <sup>2</sup> (% of CV <sup>2</sup> )  | 99.64%   |                       |                       |
| <b>HDSDHD / 6M / Enriched Environment</b> |          |                       |                       |
| <b>Subjects</b>                           | <b>N</b> | <b>Thickness (μm)</b> | <b>CE (Scheaffer)</b> |
| HDSDHD 6M EE Animal 1                     | 34876.2  | 17.95 ± 0.85          | 0.03                  |
| HDSDHD 6M EE Animal 2                     | 18141.26 | 17.91 ± 0.93          | 0.04                  |
| HDSDHD 6M EE Animal 3                     | 16736.31 | 20.77 ± 0.72          | 0.04                  |
| HDSDHD 6M EE Animal 4                     | 31279.11 | 20.75 ± 0.46          | 0.03                  |
| HDSDHD 6M EE Animal 5                     | 29055.34 | 24.84 ± 0.61          | 0.03                  |
| Mean                                      | 26017.65 | 20.45 ± 0.71          | 0.03                  |
| Standard Error                            | 3630.19  | 1.27 ± 0.08           |                       |
| CV <sup>2</sup>                           | 0.097    |                       |                       |
| CE <sup>2</sup>                           | 0.001    |                       |                       |



|                                            |          |                       |                       |
|--------------------------------------------|----------|-----------------------|-----------------------|
| CE <sup>2</sup> / CV <sup>2</sup>          | 0.011    |                       |                       |
| CVB <sup>2</sup>                           | 0.096    |                       |                       |
| CVB <sup>2</sup> (% of CV <sup>2</sup> )   | 98.94%   |                       |                       |
| <b>HD / 18M / Enriched Environment</b>     |          |                       |                       |
| <b>Subjects</b>                            | <b>N</b> | <b>Thickness (μm)</b> | <b>CE (Scheaffer)</b> |
| HD 18M EE Animal 1                         | 22571.91 | 20.44 ± 0.94          | 0.04                  |
| HD 18M EE Animal 2                         | 27194.4  | 22.16 ± 1.49          | 0.03                  |
| HD 18M EE Animal 3                         | 24906.26 | 21.48 ± 0.76          | 0.03                  |
| HD 18M EE Animal 4                         | 30110.91 | 21.19 ± 0.15          | 0.03                  |
| HD 18M EE Animal 5                         | 19483.71 | 24.34 ± 0.62          | 0.04                  |
| Mean                                       | 24853.44 | 21.92 ± 0.79          | 0.03                  |
| Standard Error                             | 1832.53  | 0.67 ± 0.22           |                       |
| CV <sup>2</sup>                            | 0.027    |                       |                       |
| CE <sup>2</sup>                            | 0.001    |                       |                       |
| CE <sup>2</sup> / CV <sup>2</sup>          | 0.043    |                       |                       |
| CVB <sup>2</sup>                           | 0.026    |                       |                       |
| CVB <sup>2</sup> (% of CV <sup>2</sup> )   | 95.65%   |                       |                       |
| <b>HDSD / 18M / Enriched Environment</b>   |          |                       |                       |
| <b>Subjects</b>                            | <b>N</b> | <b>Thickness (μm)</b> | <b>CE (Scheaffer)</b> |
| HDSD 18M EE Animal 1                       | 28600.29 | 19.58 ± 0.22          | 0.03                  |
| HDSD 18M EE Animal 2                       | 32386.03 | 19.23 ± 0.42          | 0.03                  |
| HDSD 18M EE Animal 3                       | 11443.29 | 18.6 ± 0.62           | 0.04                  |
| HDSD 18M EE Animal 4                       | 30412.63 | 25.06 ± 0.88          | 0.03                  |
| HDSD 18M EE Animal 5                       | 32329.89 | 22.78 ± 0.35          | 0.03                  |
| Mean                                       | 27034.42 | 21.05 ± 0.5           | 0.03                  |
| Standard Error                             | 3959.98  | 1.24 ± 0.12           |                       |
| CV <sup>2</sup>                            | 0.107    |                       |                       |
| CE <sup>2</sup>                            | 0.001    |                       |                       |
| CE <sup>2</sup> / CV <sup>2</sup>          | 0.01     |                       |                       |
| CVB <sup>2</sup>                           | 0.106    |                       |                       |
| CVB <sup>2</sup> (% of CV <sup>2</sup> )   | 99.03%   |                       |                       |
| <b>HDSDHD / 18M / Enriched Environment</b> |          |                       |                       |
| <b>Subjects</b>                            | <b>N</b> | <b>Thickness (μm)</b> | <b>CE (Scheaffer)</b> |
| HDSDHD 18M EE Animal 1                     | 26718.43 | 20.56 ± 0.95          | 0.03                  |

|                                          |          |              |      |
|------------------------------------------|----------|--------------|------|
| HDSDHD 18M EE Animal 2                   | 16828.71 | 21.28 ± 0.22 | 0.04 |
| HDSDHD 18M EE Animal 3                   | 28586.49 | 21.13 ± 0.97 | 0.03 |
| HDSDHD 18M EE Animal 4                   | 8636.91  | 16.85 ± 1.02 | 0.04 |
| HDSDHD 18M EE Animal 5                   | 37781.14 | 24.98 ± 0.46 | 0.03 |
| Mean                                     | 23710.34 | 20.96 ± 0.72 | 0.03 |
| Standard Error                           | 5026.82  | 1.29 ± 0.16  |      |
| CV <sup>2</sup>                          | 0.225    |              |      |
| CE <sup>2</sup>                          | 0.001    |              |      |
| CE <sup>2</sup> / CV <sup>2</sup>        | 0.005    |              |      |
| CVB <sup>2</sup>                         | 0.224    |              |      |
| CVB <sup>2</sup> (% of CV <sup>2</sup> ) | 99.5%    |              |      |

CVB<sup>2</sup>= CV<sup>2</sup> – CE<sup>2</sup> (CV, coefficient of variation; CVB, biological coefficient of variation; CE, coefficient of error). N = number of astrocytes; Mean = mean numbers in each group; 6M and 18M indicate 6 months old and 18 months old, respectively.

Table S8. Estimated Unilateral Numbers of Astrocytes (N) With the Coefficient of Error (CE) for the Hilus of Dentate Gyrus of 6-, and 18-Month-Old Female Albino Swiss Mice Fed a Hard Diet (HD), Hard/Soft Diet (HD/SD) and Hard/Soft/Hard Diet (HD/SD/HD).

| <b>HILUS – DENTATE GYRUS</b>              |          |                       |                       |
|-------------------------------------------|----------|-----------------------|-----------------------|
| <b>HD / 6M / Impoverished Environment</b> |          |                       |                       |
| <b>Subjects</b>                           | <b>N</b> | <b>Thickness (µm)</b> | <b>CE (Scheaffer)</b> |
| HD 6M IE Animal 1                         | 19735.97 | 25.99 ± 0.17          | 0.04                  |
| HD 6M IE Animal 2                         | 24046.63 | 26.58 ± 0.02          | 0.04                  |
| HD 6M IE Animal 3                         | 20681.74 | 25.74 ± 0.32          | 0.04                  |
| HD 6M IE Animal 4                         | 12045.6  | 25.32 ± 0.17          | 0.05                  |
| HD 6M IE Animal 5                         | 16625.83 | 25.46 ± 0.13          | 0.04                  |
| Mean                                      | 18627.15 | 25.82 ± 0.16          | 0.04                  |

|                                               |          |                       |                       |
|-----------------------------------------------|----------|-----------------------|-----------------------|
| Standard Error                                | 2026.62  | 0.22 ± 0.05           |                       |
| CV <sup>2</sup>                               | 0.06     |                       |                       |
| CE <sup>2</sup>                               | 0.002    |                       |                       |
| CE <sup>2</sup> / CV <sup>2</sup>             | 0.03     |                       |                       |
| CVB <sup>2</sup>                              | 0.06     |                       |                       |
| CVB <sup>2</sup> (% of CV <sup>2</sup> )      | 97.14%   |                       |                       |
| <b>HDSD / 6M / Impoverished Environment</b>   |          |                       |                       |
| <b>Subjects</b>                               | <b>N</b> | <b>Thickness (μm)</b> | <b>CE (Scheaffer)</b> |
| HDSD 6M IE Animal 1                           | 13997.31 | 25.68 ± 1.08          | 0.06                  |
| HDSD 6M IE Animal 2                           | 14231.49 | 24.45 ± 0.74          | 0.05                  |
| HDSD 6M IE Animal 3                           | 22969.97 | 25.41 ± 0.51          | 0.04                  |
| HDSD 6M IE Animal 4                           | 15060.26 | 23.51 ± 0.33          | 0.05                  |
| HDSD 6M IE Animal 5                           | 10736.2  | 22.39 ± 0.49          | 0.05                  |
| Mean                                          | 15399.05 | 24.29 ± 0.63          | 0.05                  |
| Standard Error                                | 2031.06  | 0.61 ± 0.13           |                       |
| CV <sup>2</sup>                               | 0.087    |                       |                       |
| CE <sup>2</sup>                               | 0.002    |                       |                       |
| CE <sup>2</sup> / CV <sup>2</sup>             | 0.026    |                       |                       |
| CVB <sup>2</sup>                              | 0.085    |                       |                       |
| CVB <sup>2</sup> (% of CV <sup>2</sup> )      | 97.39%   |                       |                       |
| <b>HDSDHD / 6M / Impoverished Environment</b> |          |                       |                       |
| <b>Subjects</b>                               | <b>N</b> | <b>Thickness (μm)</b> | <b>CE (Scheaffer)</b> |
| HDSDHD 6M IE Animal 1                         | 16826.91 | 22.4 ± 1.12           | 0.04                  |
| HDSDHD 6M IE Animal 2                         | 17438.66 | 25.32 ± 0.13          | 0.05                  |
| HDSDHD 6M IE Animal 3                         | 26649.09 | 25.67 ± 0.1           | 0.03                  |
| HDSDHD 6M IE Animal 4                         | 12255.09 | 22.2 ± 0.37           | 0.05                  |
| HDSDHD 6M IE Animal 5                         | 13760.23 | 22.54 ± 0.48          | 0.05                  |
| Mean                                          | 17385.99 | 23.63 ± 0.44          | 0.04                  |
| Standard Error                                | 2505.92  | 0.77 ± 0.18           |                       |
| CV <sup>2</sup>                               | 0.104    |                       |                       |
| CE <sup>2</sup>                               | 0.002    |                       |                       |
| CE <sup>2</sup> / CV <sup>2</sup>             | 0.019    |                       |                       |
| CVB <sup>2</sup>                              | 0.102    |                       |                       |
| CVB <sup>2</sup> (% of CV <sup>2</sup> )      | 98.13%   |                       |                       |

| HD / 18M / Impoverished Environment      |          |                |                |
|------------------------------------------|----------|----------------|----------------|
| Subjects                                 | N        | Thickness (μm) | CE (Scheaffer) |
| HD 18M IE Animal 1                       | 18123    | 24.97 ± 0.35   | 0.04           |
| HD 18M IE Animal 2                       | 13088.06 | 24.6 ± 0.39    | 0.05           |
| HD 18M IE Animal 3                       | 14561.14 | 25.41 ± 0.43   | 0.05           |
| HD 18M IE Animal 4                       | 15676.89 | 24.27 ± 0.95   | 0.05           |
| HD 18M IE Animal 5                       | 17948.06 | 24.93 ± 0.51   | 0.05           |
| Mean                                     | 15879.43 | 24.83 ± 0.53   | 0.03           |
| Standard Error                           | 971.69   | 0.19 ± 0.11    |                |
| CV <sup>2</sup>                          | 0.019    |                |                |
| CE <sup>2</sup>                          | 0.002    |                |                |
| CE <sup>2</sup> / CV <sup>2</sup>        | 0.122    |                |                |
| CVB <sup>2</sup>                         | 0.016    |                |                |
| CVB <sup>2</sup> (% of CV <sup>2</sup> ) | 87.85%   |                |                |
| HDSD / 18M / Impoverished Environment    |          |                |                |
| Subjects                                 | N        | Thickness (μm) | CE (Scheaffer) |
| HDSD 18M IE Animal 1                     | 13951.71 | 22.97 ± 0.71   | 0.05           |
| HDSD 18M IE Animal 2                     | 17.23    | 25.01 ± 0.74   | 0.05           |
| HDSD 18M IE Animal 3                     | 17454.34 | 24.22 ± 0.95   | 0.05           |
| HDSD 18M IE Animal 4                     | 6989.49  | 24.21 ± 1.05   | 0.06           |
| HDSD 18M IE Animal 5                     | 12233.31 | 26.34 ± 0.29   | 0.05           |
| Mean                                     | 10129.22 | 24.55 ± 0.75   | 0.05           |
| Standard Error                           | 3039.79  | 0.55 ± 0.13    |                |
| CV <sup>2</sup>                          | 0.450    |                |                |
| CE <sup>2</sup>                          | 0.002    |                |                |
| CE <sup>2</sup> / CV <sup>2</sup>        | 0.005    |                |                |
| CVB <sup>2</sup>                         | 0.448    |                |                |
| CVB <sup>2</sup> (% of CV <sup>2</sup> ) | 99.46%   |                |                |
| HDSDHD / 18M / Impoverished Environment  |          |                |                |
| Subjects                                 | N        | Thickness (μm) | CE (Scheaffer) |
| HDSDHD 18M IE Animal 1                   | 10299.26 | 26.46 ± 0.44   | 0.06           |
| HDSDHD 18M IE Animal 2                   | 13260.34 | 23.34 ± 0.66   | 0.05           |
| HDSDHD 18M IE Animal 3                   | 18426.34 | 21.75 ± 0.47   | 0.04           |
| HDSDHD 18M IE Animal 4                   | 10342.29 | 24.11 ± 0.37   | 0.05           |

|                                          |          |                       |                       |
|------------------------------------------|----------|-----------------------|-----------------------|
| HDSDHD 18M IE Animal 5                   | 15353.14 | 22.69 ± 0.96          | 0.04                  |
| Mean                                     | 13536.27 | 23.67 ± 0.58          | 0.05                  |
| Standard Error                           | 1548.71  | 0.8 ± 0.11            |                       |
| CV <sup>2</sup>                          | 0.065    |                       |                       |
| CE <sup>2</sup>                          | 0.002    |                       |                       |
| CE <sup>2</sup> / CV <sup>2</sup>        | 0.034    |                       |                       |
| CVB <sup>2</sup>                         | 0.063    |                       |                       |
| CVB <sup>2</sup> (% of CV <sup>2</sup> ) | 96.55%   |                       |                       |
| <b>HD / 6M / Enriched Environment</b>    |          |                       |                       |
| <b>Subjects</b>                          | <b>N</b> | <b>Thickness (μm)</b> | <b>CE (Scheaffer)</b> |
| HD 6M EE Animal 1                        | 16734.26 | 23.67 ± 0.59          | 0.04                  |
| HD 6M EE Animal 2                        | 14331.69 | 21.53 ± 0.58          | 0.05                  |
| HD 6M EE Animal 3                        | 12114.43 | 21.61 ± 1.06          | 0.05                  |
| HD 6M EE Animal 4                        | 20569.97 | 22.71 ± 0.63          | 0.05                  |
| HD 6M EE Animal 5                        | 18649.11 | 23.49 ± 0.31          | 0.05                  |
| Mean                                     | 16479.89 | 22.6 ± 0.63           | 0.05                  |
| Standard Error                           | 1502.85  | 0.45 ± 0.12           |                       |
| CV <sup>2</sup>                          | 0.042    |                       |                       |
| CE <sup>2</sup>                          | 0.002    |                       |                       |
| CE <sup>2</sup> / CV <sup>2</sup>        | 0.054    |                       |                       |
| CVB <sup>2</sup>                         | 0.039    |                       |                       |
| CVB <sup>2</sup> (% of CV <sup>2</sup> ) | 94.62%   |                       |                       |
| <b>HDSD / 6M / Enriched Environment</b>  |          |                       |                       |
| <b>Subjects</b>                          | <b>N</b> | <b>Thickness (μm)</b> | <b>CE (Scheaffer)</b> |
| HDSD 6M EE Animal 1                      | 7829.31  | 19.13 ± 0.96          | 0.05                  |
| HDSD 6M EE Animal 2                      | 20270.14 | 20.07 ± 0.66          | 0.04                  |
| HDSD 6M EE Animal 3                      | 25596.26 | 20.94 ± 0.47          | 0.04                  |
| HDSD 6M EE Animal 4                      | 18766.37 | 19.7 ± 0.59           | 0.04                  |
| HDSD 6M EE Animal 5                      | 13943.66 | 19.81 ± 0.44          | 0.05                  |
| Mean                                     | 17281.15 | 19.93 ± 0.62          | 0.04                  |
| Standard Error                           | 3006.30  | 0.3 ± 0.09            |                       |
| CV <sup>2</sup>                          | 0.151    |                       |                       |
| CE <sup>2</sup>                          | 0.002    |                       |                       |
| CE <sup>2</sup> / CV <sup>2</sup>        | 0.012    |                       |                       |

|                                           |          |                       |                       |
|-------------------------------------------|----------|-----------------------|-----------------------|
| CVB <sup>2</sup>                          | 0.15     |                       |                       |
| CVB <sup>2</sup> (% of CV <sup>2</sup> )  | 98.84%   |                       |                       |
| <b>HDSDHD / 6M / Enriched Environment</b> |          |                       |                       |
| <b>Subjects</b>                           | <b>N</b> | <b>Thickness (μm)</b> | <b>CE (Scheaffer)</b> |
| HDSDHD 6M EE Animal 1                     | 17734.46 | 16.29 ± 0.87          | 0.04                  |
| HDSDHD 6M EE Animal 2                     | 10518.51 | 17.37 ± 0.66          | 0.05                  |
| HDSDHD 6M EE Animal 3                     | 9962.57  | 20.55 ± 0.71          | 0.05                  |
| HDSDHD 6M EE Animal 4                     | 19193.14 | 21.01 ± 0.35          | 0.04                  |
| HDSDHD 6M EE Animal 5                     | 16498.11 | 23.87 ± 0.91          | 0.05                  |
| Mean                                      | 14781.36 | 19.82 ± 0.7           | 0.05                  |
| Standard Error                            | 1904.26  | 1.36 ± 0.1            |                       |
| CV <sup>2</sup>                           | 0.083    |                       |                       |
| CE <sup>2</sup>                           | 0.002    |                       |                       |
| CE <sup>2</sup> / CV <sup>2</sup>         | 0.026    |                       |                       |
| CVB <sup>2</sup>                          | 0.081    |                       |                       |
| CVB <sup>2</sup> (% of CV <sup>2</sup> )  | 97.38%   |                       |                       |
| <b>HD / 18M / Enriched Environment</b>    |          |                       |                       |
| <b>Subjects</b>                           | <b>N</b> | <b>Thickness (μm)</b> | <b>CE (Scheaffer)</b> |
| HD 18M EE Animal 1                        | 13646.14 | 18.98 ± 0.45          | 0.05                  |
| HD 18M EE Animal 2                        | 21006.17 | 22.73 ± 1.27          | 0.04                  |
| HD 18M EE Animal 3                        | 15297.86 | 21.45 ± 0.93          | 0.04                  |
| HD 18M EE Animal 4                        | 16604.91 | 20.28 ± 0.32          | 0.04                  |
| HD 18M EE Animal 5                        | 13901.83 | 23.57 ± 0.13          | 0.05                  |
| Mean                                      | 16091.38 | 21.4 ± 0.62           | 0.04                  |
| Standard Error                            | 1338.32  | 0.82 ± 0.21           |                       |
| CV <sup>2</sup>                           | 0.035    |                       |                       |
| CE <sup>2</sup>                           | 0.002    |                       |                       |
| CE <sup>2</sup> / CV <sup>2</sup>         | 0.059    |                       |                       |
| CVB <sup>2</sup>                          | 0.033    |                       |                       |
| CVB <sup>2</sup> (% of CV <sup>2</sup> )  | 94.14%   |                       |                       |
| <b>HDSD / 18M / Enriched Environment</b>  |          |                       |                       |
| <b>Subjects</b>                           | <b>N</b> | <b>Thickness (μm)</b> | <b>CE (Scheaffer)</b> |
| HDSD 18M EE Animal 1                      | 19327.89 | 18.86 ± 0.41          | 0.05                  |
| HDSD 18M EE Animal 2                      | 17348.83 | 19.16 ± 0.26          | 0.05                  |

|                                            |          |                       |                       |
|--------------------------------------------|----------|-----------------------|-----------------------|
| HDSD 18M EE Animal 3                       | 7131.51  | 19.14 ± 0.72          | 0.05                  |
| HDSD 18M EE Animal 4                       | 19113.77 | 24.3 ± 0.87           | 0.04                  |
| HDSD 18M EE Animal 5                       | 18293.57 | 22.72 ± 0.46          | 0.04                  |
| Mean                                       | 16243.11 | 20.83 ± 0.54          | 0.04                  |
| Standard Error                             | 2304.39  | 1.12 ± 0.11           |                       |
| CV <sup>2</sup>                            | 0.101    |                       |                       |
| CE <sup>2</sup>                            | 0.002    |                       |                       |
| CE <sup>2</sup> / CV <sup>2</sup>          | 0.019    |                       |                       |
| CVB <sup>2</sup>                           | 0.099    |                       |                       |
| CVB <sup>2</sup> (% of CV <sup>2</sup> )   | 98.08%   |                       |                       |
| <b>HDSDHD / 18M / Enriched Environment</b> |          |                       |                       |
| <b>Subjects</b>                            | <b>N</b> | <b>Thickness (µm)</b> | <b>CE (Scheaffer)</b> |
| HDSDHD 18M EE Animal 1                     | 15587.14 | 20.02 ± 1.13          | 0.04                  |
| HDSDHD 18M EE Animal 2                     | 10102.11 | 20.96 ± 0.47          | 0.05                  |
| HDSDHD 18M EE Animal 3                     | 15152.49 | 21.52 ± 0.44          | 0.05                  |
| HDSDHD 18M EE Animal 4                     | 4169.49  | 16.4 ± 0.52           | 0.06                  |
| HDSDHD 18M EE Animal 5                     | 18137.31 | 23.52 ± 0.25          | 0.04                  |
| Mean                                       | 12629.71 | 20.48 ± 0.56          | 0.05                  |
| Standard Error                             | 2484.04  | 1.17 ± 0.15           |                       |
| CV <sup>2</sup>                            | 0.193    |                       |                       |
| CE <sup>2</sup>                            | 0.002    |                       |                       |
| CE <sup>2</sup> / CV <sup>2</sup>          | 0.012    |                       |                       |
| CVB <sup>2</sup>                           | 0.191    |                       |                       |
| CVB <sup>2</sup> (% of CV <sup>2</sup> )   | 98.8%    |                       |                       |

CVB<sup>2</sup> = CV<sup>2</sup> – CE<sup>2</sup> (CV, coefficient of variation; CVB, biological coefficient of variation; CE, coefficient of error). N = number of astrocytes; Mean = mean numbers in each group; 6M and 18M indicate 6 months old and 18 months old, respectively.
